# Supplementary material for: A mechanistic investigation of the ruthenium porphyrin catalysed aziridination of olefins by aryl azides
Source: Royal Society of Chemistry journal article supplement (doi:10.1039/c5dt00951k), 2015-01-01
Supplement: c5dt00951k1.pdf [file c5dt00951k1.pdf]

## Electronic Supporting Information of

# A Mechanistic Investigation of the Ruthenium Porphyrin-Catalysed Aziridination of Olefins by Aryl Azides

Paolo Zardi, Alessandro Pozzoli, Francesco Ferretti, Gabriele Manca, Carlo Mealli and Emma Gallo.

### Table of Contents

|                                                                                                                                                                               |    |
|-------------------------------------------------------------------------------------------------------------------------------------------------------------------------------|----|
| 1. Determination of the kinetic order with respect to 4-nitrophenyl azide concentration using Ru( <i>p</i> -X-TPP)CO catalysts <b>2b-g</b> .....                              | 2  |
| 2. Kinetics of the reaction between $\alpha$ -methylstyrene and 3,5-bis(trifluoromethyl)phenyl azide promoted by complex <b>2e</b> .....                                      | 3  |
| 2.1. Rate constants and reaction rate at different olefin concentrations.....                                                                                                 | 3  |
| 2.2. Kinetic order with respect to the catalyst <b>2e</b> concentration.....                                                                                                  | 4  |
| 3. Reaction between $\alpha$ -methylstyrene and 3,5-bis(trifluoromethyl)phenyl azide promoted by complex <b>3b</b> .....                                                      | 5  |
| 3.1. Rate constants at different olefin concentrations. ....                                                                                                                  | 5  |
| 3.2. Kinetic order with respect to the catalyst <b>3b</b> concentration. ....                                                                                                 | 6  |
| 4. Kinetics of the uncatalysed reaction between $\alpha$ -methylstyrene and 3,5-bis(trifluoromethyl)phenyl azide. ....                                                        | 7  |
| 5. Ligand exchange reaction between complex <b>3b</b> and triazoline <b>1a</b> . ....                                                                                         | 8  |
| 6. Synthesis of other ruthenium triazoline porphyrin complexes. ....                                                                                                          | 9  |
| 6.1. General procedure for the synthesis of Ru(porphyrin)(1-( <i>p</i> -nitrophenyl)-5-methyl,5-phenyl-1,2,3-triazoline)CO ( <b>10</b> , <b>11</b> and <b>3c</b> ) .....      | 9  |
| 6.2 Synthesis of Ru( <i>p</i> -MeO-TPP)(1- <i>p</i> -nitrophenyl-5-methyl-5-phenyl-1,2,3-triazoline)CO ( <b>10</b> )..                                                        | 9  |
| 6.3 Synthesis of Ru( <i>p</i> -Cl-TPP)(1- <i>p</i> -nitrophenyl-5-methyl-5-phenyl-1,2,3-triazoline)CO ( <b>11</b> ). ...                                                      | 10 |
| 6.4 Synthesis of Ru( <i>p</i> -CF <sub>3</sub> -TPP)(1- <i>p</i> -nitrophenyl-5-methyl-5-phenyl-1,2,3-triazoline)CO ( <b>3c</b> ). .                                          | 10 |
| 7. ATR-IR spectrum of the crude of the Ru( <i>p</i> -CF <sub>3</sub> -TPP)CO-catalysed reaction between 3,5-bis(trifluoromethyl)phenyl azide and $\alpha$ -methylstyrene..... | 10 |
| 8. Variation of the kinetics of the Ru(TPP)CO-catalysed reaction between 4-nitrophenyl azide and $\alpha$ -methylstyrene upon catalyst drying.....                            | 11 |
| 9. DFT data .....                                                                                                                                                             | 12 |
| References.....                                                                                                                                                               | 37 |

# 1. Determination of the kinetic order with respect to 4-nitrophenyl azide concentration using Ru(*p*-X-TPP)CO catalysts 2b-g.

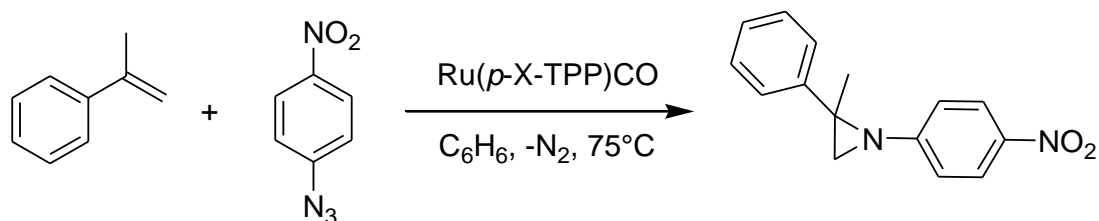

Ru(*p*-X-TPP)CO ( $1.2 \times 10^{-2}$  mmol), 4-nitrophenyl azide (100 mg,  $6.1 \times 10^{-1}$  mmol) and  $\alpha$ -methylstyrene ( $4.00 \times 10^{-2}$  mL, 3.1 mmol) were dissolved in benzene (30 mL). The resulting solution was immediately placed in a preheated oil bath at 75°C and stirred for one minute to completely dissolve all reagents, then 0.2 mL were withdrawn for IR analysis at regular time intervals. The consumption of the organic azide was then followed by measuring the absorbance (*A*) of the  $\nu(\text{N}=\text{N})$  signal at 2150-2100 cm<sup>-1</sup>. Rate constants with respect to the aryl azide concentration for each catalyst were determined from the specific variation of *A* with respect to time.

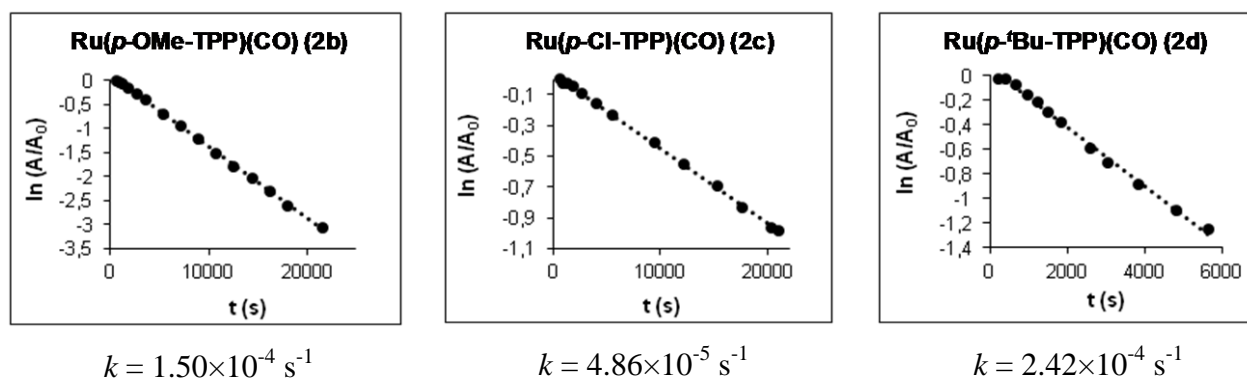

**Figure S1.** First order kinetic dependence with respect to 4-nitrophenyl azide concentration using complex 2b, complex 2c or complex 2d as the catalyst.

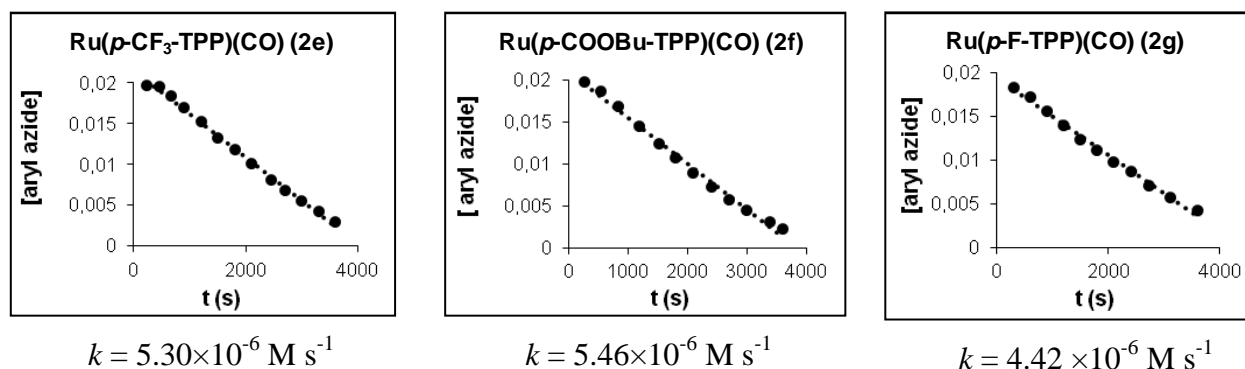

**Figure S2.** Zero order kinetic dependence with respect to 4-nitrophenyl azide concentration using complex 2e, complex 2f or complex 2g as the catalyst.

## 2. Kinetics of the reaction between $\alpha$ -methylstyrene and 3,5-bis(trifluoromethyl)phenyl azide promoted by complex 2e.

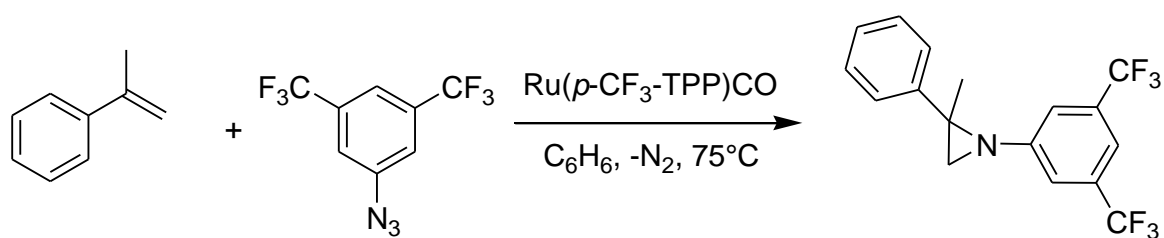

### 2.1. Rate constants and reaction rate at different olefin concentrations.

Complex **2e** (12.5 mg,  $1.2 \times 10^{-2}$  mmol) and 3,5-bis(trifluoromethyl)phenyl azide (153 mg,  $6.0 \times 10^{-1}$  mmol) were dissolved in the opportune  $\alpha$ -methylstyrene/benzene mixture (30 mL). The resulting solution was immediately placed in a preheated oil bath at  $75^\circ\text{C}$  and stirred for one minute to completely dissolve all reagents, then 0.2 mL were withdrawn for IR analysis at regular time intervals. The consumption of the organic azide was then followed by measuring the absorbance ( $A$ ) of the  $\nu(\text{N}=\text{N})$  signal at  $2150\text{-}2100\text{ cm}^{-1}$ . Rate constants with respect to the aryl azide concentration were determined from the specific variation of  $A$  with respect to time. The reaction rate was calculated at 90% of azide conversion.

**Table S1.** Rate constants with respect to 3,5-bis(trifluoromethyl)phenyl azide and reaction rates at different  $\alpha$ -methylstyrene concentrations.

| [olefin]<br>(mol/L) | [catalyst]<br>(mol/L) | $k$                                    | $k/[\text{cat}]$                     | reaction rate<br>$-\Delta[\text{Ar}'\text{N}_3]/\Delta t$ ( $\text{M s}^{-1}$ ) |
|---------------------|-----------------------|----------------------------------------|--------------------------------------|---------------------------------------------------------------------------------|
| 0.10                | $4.10 \times 10^{-4}$ | $1.70 \times 10^{-5} \text{ M s}^{-1}$ | $4.15 \times 10^{-2} \text{ s}^{-1}$ | $1.49 \times 10^{-5}$                                                           |
| 0.38                | $4.07 \times 10^{-4}$ | $2.60 \times 10^{-5} \text{ M s}^{-1}$ | $6.39 \times 10^{-2} \text{ s}^{-1}$ | $2.26 \times 10^{-5}$                                                           |
| 0.77                | $4.07 \times 10^{-4}$ | $3.29 \times 10^{-5} \text{ M s}^{-1}$ | $8.08 \times 10^{-2} \text{ s}^{-1}$ | $2.95 \times 10^{-5}$                                                           |
| 1.50                | $4.17 \times 10^{-4}$ | $3.40 \times 10^{-3} \text{ M s}^{-1}$ | $8.16 \times 10^{-2} \text{ s}^{-1}$ | $2.90 \times 10^{-5}$                                                           |
| 2.05                | $4.10 \times 10^{-4}$ | mixed order                            | mixed order                          | $2.51 \times 10^{-5}$                                                           |
| 3.08                | $3.94 \times 10^{-4}$ | $3.04 \times 10^{-3} \text{ s}^{-1}$   | $7.73 \text{ M}^{-1} \text{ s}^{-1}$ | $2.01 \times 10^{-5}$                                                           |
| 4.36                | $4.07 \times 10^{-4}$ | $2.76 \times 10^{-3} \text{ s}^{-1}$   | $6.78 \text{ M}^{-1} \text{ s}^{-1}$ | $1.94 \times 10^{-5}$                                                           |

## 2.2. Kinetic order with respect to the catalyst **2e** concentration.

The opportune catalyst amount, 3,5-bis(trifluoromethyl)phenyl azide (153 mg,  $6.0 \times 10^{-2}$  mmol) and  $\alpha$ -methylstyrene (0.390 mL, 3.0 mmol) were dissolved in benzene (30 mL). The resulting solution was immediately placed in a preheated oil bath at 75°C and stirred for one minute to completely dissolve all reagents, then 0.2 mL were withdrawn for IR analysis at regular time intervals. The consumption of the organic azide was then followed by measuring the absorbance ( $A$ ) of the  $\nu(\text{N}=\text{N})$  signal at 2150-2100  $\text{cm}^{-1}$ . Zero order rate constants with respect to the aryl azide concentration were determined from the variation of  $A$  with respect to time.

**Table S2.** Rate constants with respect to 3,5-bis(trifluoromethyl)phenyl azide and reaction rates at different catalyst concentrations.

| molar ratio cat/azide/olefin | [Ru( <i>p</i> -CF <sub>3</sub> -TPP)CO] (M) | $k$ (M s <sup>-1</sup> ) |
|------------------------------|---------------------------------------------|--------------------------|
| 0.4:50:250                   | $1.58 \times 10^{-4}$                       | $9.31 \times 10^{-6}$    |
| 0.6:50:250                   | $2.38 \times 10^{-4}$                       | $1.08 \times 10^{-5}$    |
| 0.8:50:250                   | $3.17 \times 10^{-4}$                       | $1.66 \times 10^{-5}$    |
| 1:50:250                     | $4.00 \times 10^{-4}$                       | $1.83 \times 10^{-5}$    |
| 1.2:50:250                   | $4.75 \times 10^{-4}$                       | $2.10 \times 10^{-5}$    |
| 3:50:250                     | $1.20 \times 10^{-3}$                       | $3.74 \times 10^{-5}$    |

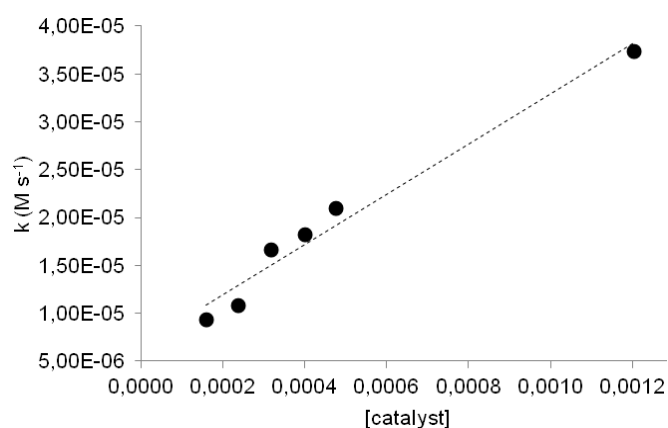

**Figure S3.** Dependence of the measured rate constants on **2e** concentrations.

### 3. Reaction between $\alpha$ -methylstyrene and 3,5-bis(trifluoromethyl)phenyl azide promoted by complex 3b.

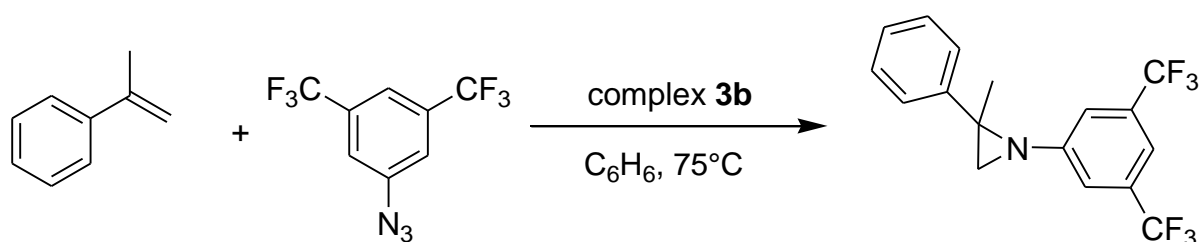

#### 3.1. Rate constants at different olefin concentrations.

Complex **3b** (16.7 mg,  $1.2 \times 10^{-2}$  mmol) and 3,5-bis(trifluoromethyl)phenyl azide (153 mg,  $6.0 \times 10^{-2}$  mmol) were dissolved in the opportune  $\alpha$ -methylstyrene/benzene mixture (30 mL). The resulting solution was immediately placed in a preheated oil bath at  $75^\circ C$  and stirred for one minute to completely dissolve all reagents, then 0.2 mL were withdrawn for IR analysis at regular time intervals. The consumption of the organic azide was then followed by measuring the absorbance ( $A$ ) of the  $\nu(N=N)$  signal at  $2150-2100\text{ cm}^{-1}$ . First order rate constants with respect to the aryl azide concentration were determined from the variation of  $A$  with respect to time.

**Table S3.** Rate constants with respect to 3,5-bis(trifluoromethyl)phenyl azide and reaction rates at different  $\alpha$ -methylstyrene concentrations.

| molar ratio<br>cat./azide/olefin | $[\alpha\text{-methylstyrene}]$ (M) | [catalyst] (M)        | $k$ ( $s^{-1}$ )      | $k/[\text{cat}]$ ( $M^{-1} s^{-1}$ ) |
|----------------------------------|-------------------------------------|-----------------------|-----------------------|--------------------------------------|
| 1:50:250                         | 0.100                               | $3.74 \times 10^{-4}$ | $1.13 \times 10^{-4}$ | 0,302                                |
| 1:50 :641                        | 0.256                               | $3.98 \times 10^{-4}$ | $1.97 \times 10^{-4}$ | 0,495                                |
| 1:50:1923                        | 0.769                               | $4.03 \times 10^{-4}$ | $9.93 \times 10^{-5}$ | 0,246                                |
| 1:50:3200                        | 1.28                                | $4.06 \times 10^{-4}$ | $6.76 \times 10^{-5}$ | 0,167                                |

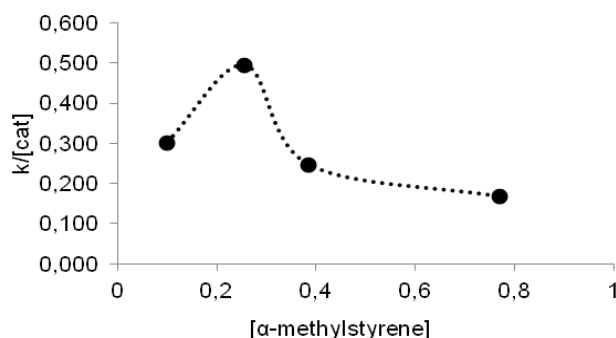

**Figure S4.** Dependence of the measured rate constants on  $\alpha$ -methylstyrene concentrations.

### 3.2. Kinetic order with respect to the catalyst **3b** concentration.

The opportune catalyst amount, 3,5-*bis*(trifluoromethyl)phenyl azide (153 mg,  $6.0 \times 10^{-2}$  mmol) and  $\alpha$ -methylstyrene (0.390 mL, 3.0 mmol) were dissolved in benzene (30 mL). The resulting solution was immediately placed in a preheated oil bath at 75°C and stirred for one minute to completely dissolve all reagents, then 0.2 mL were withdrawn for IR analysis at regular time intervals. The consumption of the organic azide was then followed by measuring the absorbance (*A*) of the  $\nu(\text{N}=\text{N})$  signal at 2150-2100  $\text{cm}^{-1}$ . First order rate constants with respect to the aryl azide concentration were determined from the variation of *A* with respect to time.

**Table S4.** Rate constants with respect to 3,5-*bis*(trifluoromethyl)phenyl azide and reaction rates at different catalyst concentrations.

| molar ratio<br>catalyst/azide/substrate | [catalyst]            | <i>k</i> ( $\text{s}^{-1}$ ) |
|-----------------------------------------|-----------------------|------------------------------|
| 0.5:50:250                              | $2.00 \times 10^{-4}$ | $4.00 \times 10^{-5}$        |
| 0.7:50:250                              | $2.80 \times 10^{-4}$ | $6.10 \times 10^{-5}$        |
| 1:50:250                                | $4.00 \times 10^{-4}$ | $1.14 \times 10^{-4}$        |

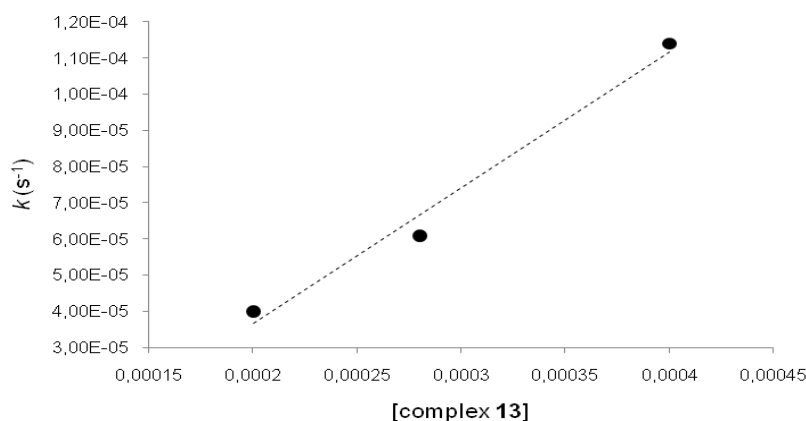

**Figure S5.** Dependence of the measured rate constants on **3b** concentrations.

#### 4. Kinetics of the uncatalysed reaction between $\alpha$ -methylstyrene and 3,5-bis(trifluoromethyl)phenyl azide.

$\alpha$ -Methylstyrene (15.0 ml, 115 mmol) was dissolved in benzene (15.0 mL) then 3,5-bis(trifluoromethyl)phenyl azide (153 mg,  $6.0 \times 10^{-1}$  mmol) was added. The resulting solution was immediately placed in a preheated oil bath at 75 °C. The solution was stirred for one minute and then 0.2 mL samples were withdrawn for IR analysis at regular time intervals. The consumption of the organic azide was then followed by measuring the absorbance ( $A$ ) of the  $\nu(\text{N}=\text{N})$  signal at  $2116 \text{ cm}^{-1}$ . A first-order rate constant ( $k_1$ ) of  $1.34 \times 10^{-5} \text{ s}^{-1}$  was obtained. The rate constant of the uncatalysed reaction between  $\alpha$ -methylstyrene and 4-nitrophenyl azide ( $k_2 = 1.15 \times 10^{-5} \text{ s}^{-1}$ ) was reported in a previous paper.<sup>[1]</sup>  $k_2/k_1 = 0.86$ .

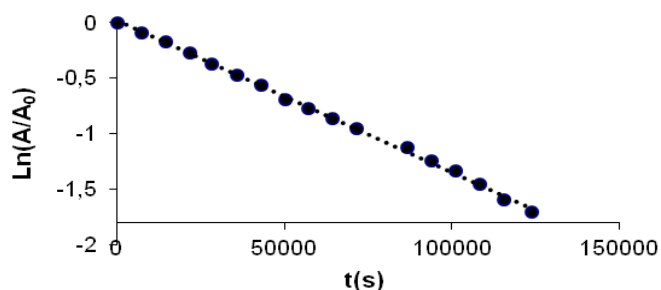

**Figure S6.** 3,5-Bis(trifluoromethyl)phenyl azide consumption in absence of the catalyst.

## 5. Ligand exchange reaction between complex **3b** and triazoline **1a**.

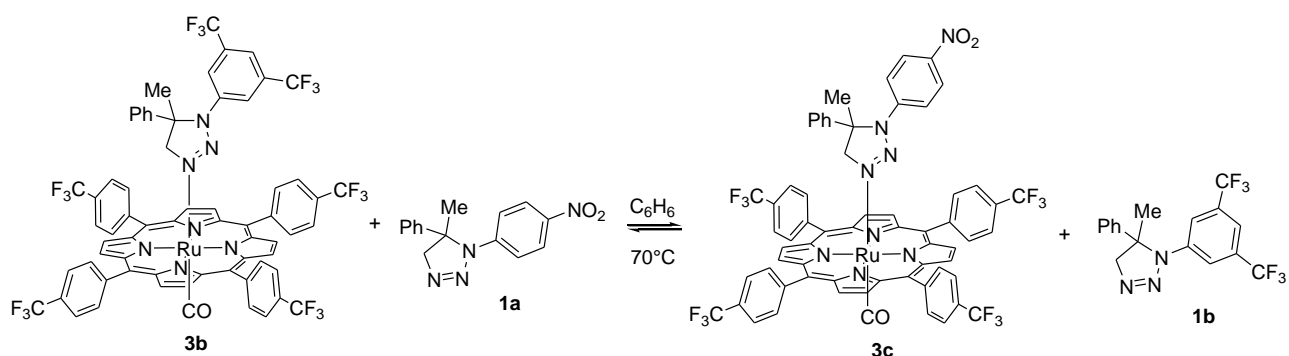

Complex **3b** (22.2 mg,  $1.6 \times 10^{-2}$  mmol) and triazoline **1a** (5.0 mg,  $1.8 \times 10^{-2}$  mmol) were dissolved in deuterated benzene (0.75 mL) in a NMR tube.  $^1H$  NMR and  $^{19}F$  NMR spectra of the sample were immediately recorded and the appearance of the signals related to the formation of complex **3c** demonstrated that the exchange reaction takes place even at room temperature. The NMR tube was heated at  $70^\circ C$  for 3 hours and  $^1H$  NMR analysis showed the presence of both complexes **3c** and **3b** in a 1:2 ratio (Figure S7). The trifluoromethyl groups signals of the free triazoline **1b** and of the axial ligand of complex **3b** were detected in a 1:2 ratio by  $^{19}F$  NMR analysis (Figure S8).

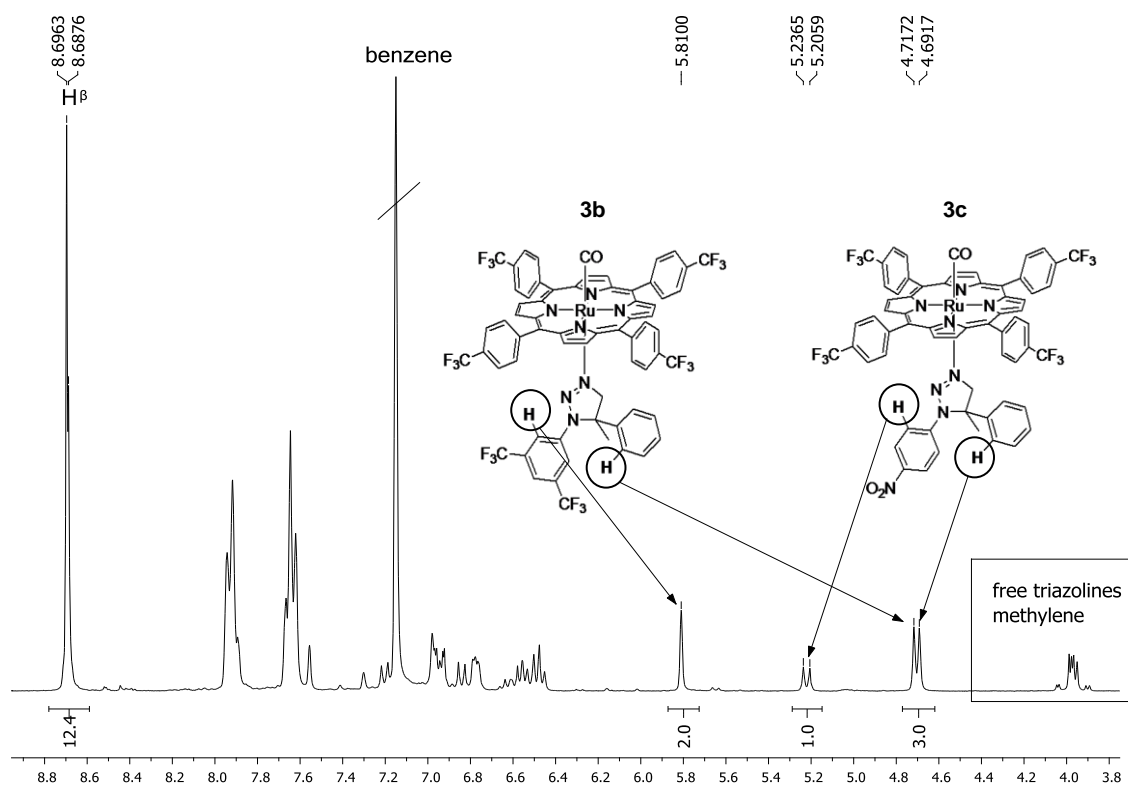

Figure S7.  $^1H$  NMR spectrum at the end of the reaction.



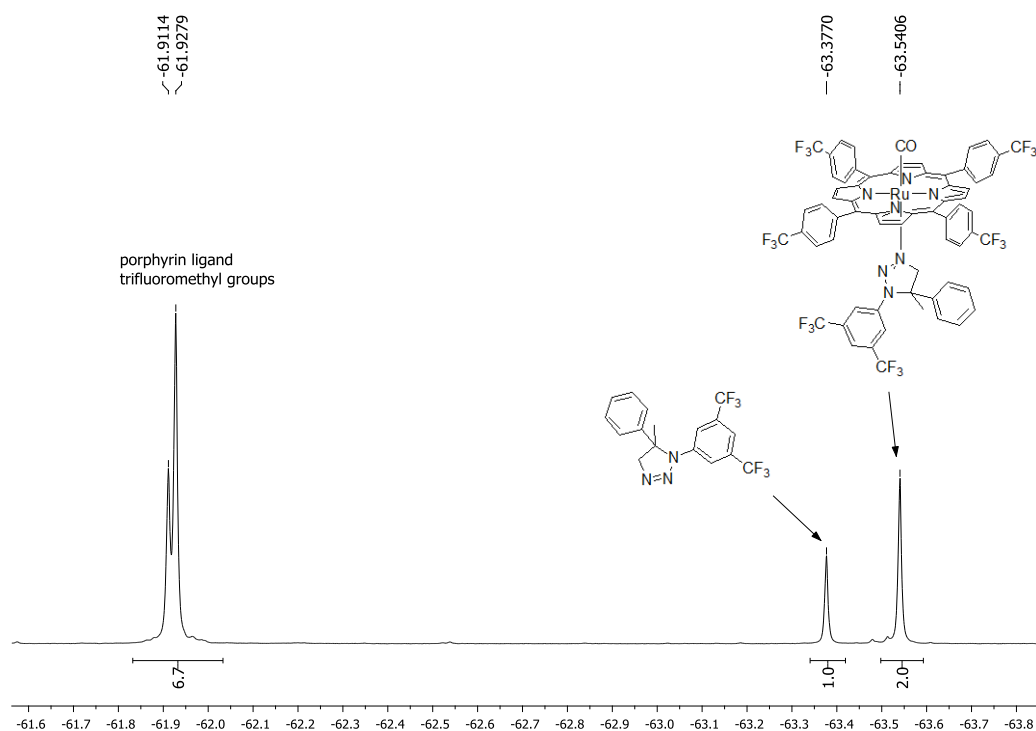

**Figure S8.**  $^{19}\text{F}$  NMR spectrum at the end of the reaction.

## 6. Synthesis of other ruthenium triazoline porphyrin complexes.

### 6.1. General procedure for the synthesis of Ru(porphyrin)(1-(*p*-nitrophenyl)-5-methyl,5-phenyl-1,2,3-triazoline)CO (**10**, **11** and **3c**)

In a typical experiment a slight molar excess of **1a** was added to a benzene suspension of the Ru(porphyrin)(CO) complex (**2b**, **2c** or **2e**). The resulting solution was stirred at 75°C (unless otherwise specified), until TLC or infrared monitoring confirmed the consumption of the starting complex. The solution was then concentrated to one fifth of the starting volume and *n*-hexane was added to precipitate the product. The solid was collected by filtration, washed with *n*-hexane and dried *in vacuo*.

### 6.2 Synthesis of Ru(*p*-MeO-TPP)(1-*p*-nitrophenyl-5-methyl-5-phenyl-1,2,3-triazoline)CO (**10**).

Reaction conditions: **2b**: (40 mg,  $4.6 \times 10^{-2}$  mmol), **1a** (13.5 mg  $4.8 \times 10^{-2}$  mmol), benzene (10 mL). Stirring time: 60 min. 44.7 mg, 84% yield. Anal. Calcd for  $\text{C}_{64}\text{H}_{50}\text{N}_8\text{O}_7\text{Ru}$  (1144.22): C, 67.18; H, 4.40; N, 9.76. Found: C, 66.80; H, 4.67; N 9.21.  $^1\text{H}$  NMR ( $\text{C}_6\text{D}_6$ , 300 MHz)  $\delta$  9.08 (s, 8H), 8.12 (d, 4H,  $J = 8.2$  Hz), 8.02 (d, 4H,  $J = 8.2$  Hz), 7.16 (overlapping with the solvent signal, 2H), 7.10 (d, 4H,  $J = 8.2$  Hz), 7.05 (d, 4H,  $J = 8.2$  Hz), 6.63 (t, 1H,  $J = 7.0$  Hz), 6.57 (t, 2H,  $J = 7.0$  Hz), 5.30 (d, 2H,  $J = 8.4$  Hz), 4.75 (d, 2H,  $J = 7.0$  Hz), 3.61 (s, 3H), -0.92 (s, 3H), -0.99 (d, 1H,  $J = 16.9$  Hz), -1.14 (d, 1H,  $J = 16.9$  Hz). IR (nujol):  $\nu$  ( $\text{cm}^{-1}$ ) = 1948 (CO).

### 6.3 Synthesis of Ru(*p*-Cl-TPP)(1-*p*-nitrophenyl-5-methyl-5-phenyl-1,2,3-triazoline)CO (11).

Reaction conditions: **2c** (77 mg,  $8.8 \times 10^{-2}$  mmol), **1a** (25.5 mg,  $9.0 \times 10^{-2}$  mmol), benzene (10 mL). Stirring time: 10 h at room temperature. 80.5 mg, 79% yield. Anal. Calcd for  $C_{60}H_{38}Cl_4N_8O_3Ru$  (1161.90): C, 62.02; H, 3.30; N, 9.64. Found: C, 62.30; H, 3.52; N 9.39.  $^1H$  NMR ( $C_6D_6$ , 300 MHz)  $\delta$  8.80 (s, 8H), 7.78 (m, 8H), 7.38 (m, 8H), 7.16 (overlapping with the solvent signal), 6.60 (t, 1H,  $J = 7.2$  Hz), 6.52 (t, 2H,  $J = 7.2$  Hz), 5.20 (d, 2H,  $J = 9.2$  Hz), 4.67 (d, 2H,  $J = 7.2$  Hz), -0.94 (s, 3H), -1.11 (d, 1H,  $J = 16.6$  Hz), -1.33 (d, 1H,  $J = 16.6$  Hz). IR (nujol):  $\nu$  ( $cm^{-1}$ ) = 1963 (CO).

### 6.4 Synthesis of Ru(*p*-CF<sub>3</sub>-TPP)(1-*p*-nitrophenyl-5-methyl-5-phenyl-1,2,3-triazoline)CO (3c).

The stoichiometric reaction between **2e** and **1a** was followed by  $^1H$  NMR analysis: **2e** (16.9 mg,  $1.7 \times 10^{-2}$  mmol) and **1a** (4.9 mg,  $1.7 \times 10^{-2}$  mmol) were dissolved in  $C_6D_6$  (1.0 mL) at room temperature. After 10 minutes the signals of **2e** and **1a** were no more detectable, and a new pattern attributable to **3c** was monitored.  $^1H$  NMR ( $C_6D_6$ , 300 MHz)  $\delta$  8.71 (s, 8H), 7.90-7.96 (m, 8H), 7.63-7.66 (m, 8H), 7.22 (d, 2H,  $J = 9.0$  Hz), 6.65 (t, 1H,  $J = 7.5$  Hz), 6.55 (t, 2H,  $J = 7.5$  Hz), 5.24 (d, 2H,  $J = 9.0$  Hz), 4.71 (d, 2H,  $J = 7.5$  Hz), -0.80 (s, 3H), -1.07 (d, 1H,  $J = 17.0$  Hz), -1.31 (d, 1H,  $J = 17.0$  Hz).

## 7. ATR-IR spectrum of the crude of the Ru(*p*-CF<sub>3</sub>-TPP)CO-catalysed reaction between 3,5-bis(trifluoromethyl)phenyl azide and $\alpha$ -methylstyrene.

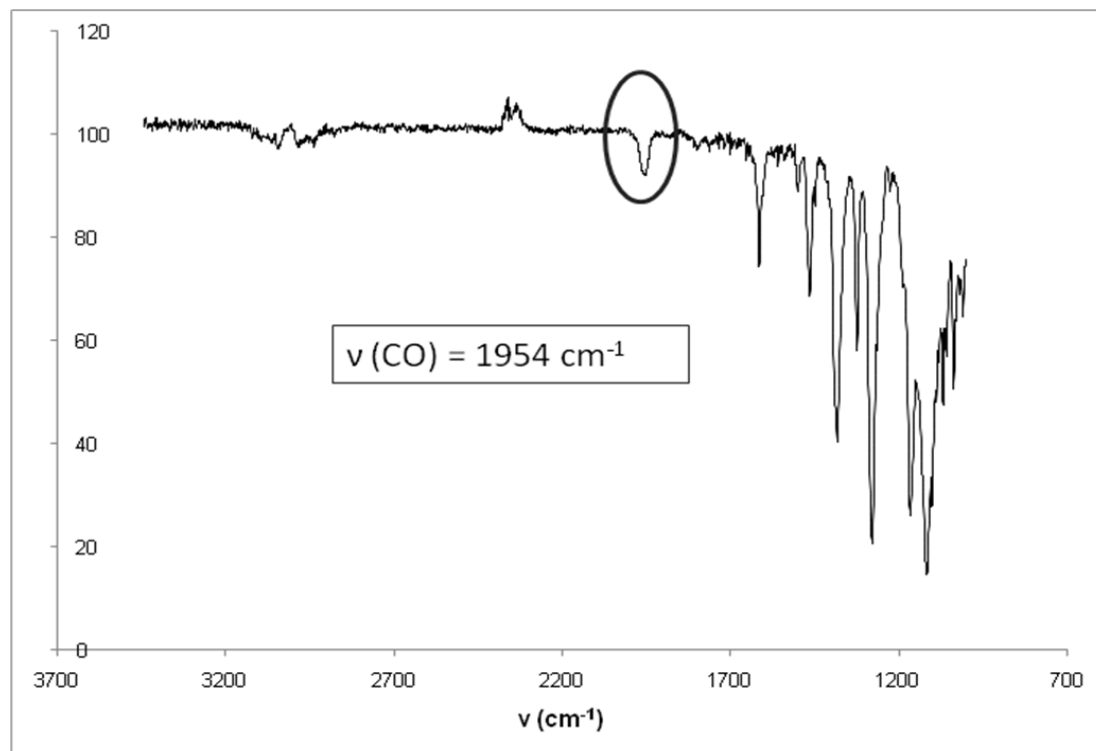

**Figure S9.** ATR-IR spectrum between 2100-1550  $cm^{-1}$  of the reaction crude at the end of the reaction (a) and of the starting catalyst (Ru(*p*-CF<sub>3</sub>-TPP)CO) (**2e**) (b).

## 8. Variation of the kinetics of the Ru(TPP)CO-catalysed reaction between 4-nitrophenyl azide and $\alpha$ -methylstyrene upon catalyst drying.

The “wet” catalyst Ru(TPP)CO (**2a**) was obtained after the chromatographic purification following a reported procedure.<sup>[2]</sup> The dried catalyst was obtained after drying “wet” Ru(TPP)CO for 2 hours at 120°C.

The catalyst, 4-nitrophenyl azide (98.5 mg, 0.60 mmol) and  $\alpha$ -methylstyrene (400  $\mu$ L, 3.1 mmol) were dissolved in benzene (30 mL). The resulting solution was immediately placed in a preheated oil bath at 75°C and stirred for one minute to completely dissolve all reagents, then 0.2 mL were withdrawn for IR analysis at regular time intervals. The consumption of the organic azide was then followed by measuring the absorbance ( $A$ ) of the  $\nu(\text{N}=\text{N})$  signal at 2150-2100  $\text{cm}^{-1}$ . First order rate constants with respect to the aryl azide concentration for each catalyst were determined from the variation of  $A$  with respect to time.

*Experiment A.* Catalyst: “wet” Ru(TPP)CO (7.4 mg,  $1.0 \times 10^{-2}$  mmol);  $k_{\text{wet}} = 2.67 \times 10^{-4} \text{ s}^{-1}$ .

*Experiment B.* Catalyst: dried Ru(TPP)CO (7.4 mg,  $1.0 \times 10^{-2}$  mmol);  $k_{\text{dried}} = 6.11 \times 10^{-4} \text{ s}^{-1}$ .

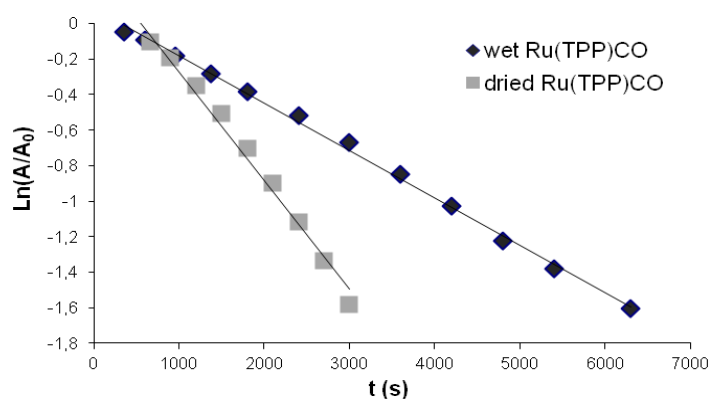

**Figure S10.** Aryl azide consumption using “wet” (dark grey) and dried (light grey) Ru(TPP)CO.

## 9. DFT data

**Figure S11:** Free/energy reaction pathway for the [Ru](CO)-catalysed aziridination of isobutene by  $\text{CH}_3\text{N}_3$ .

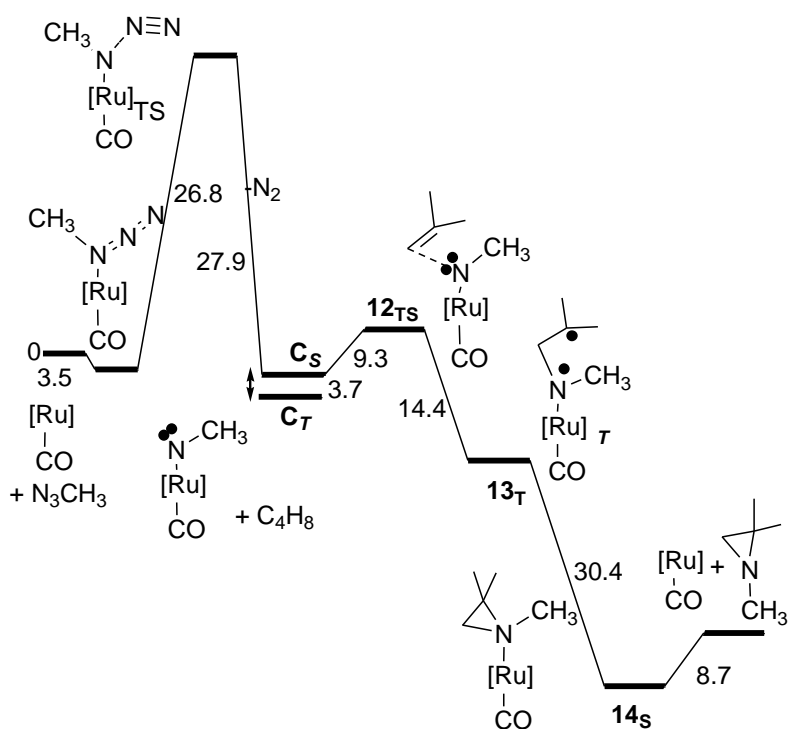

**Figure S12:** Optimised structure of compound  $[\text{Ru}](\text{Ar}'\text{N}_3)(\text{CO})$

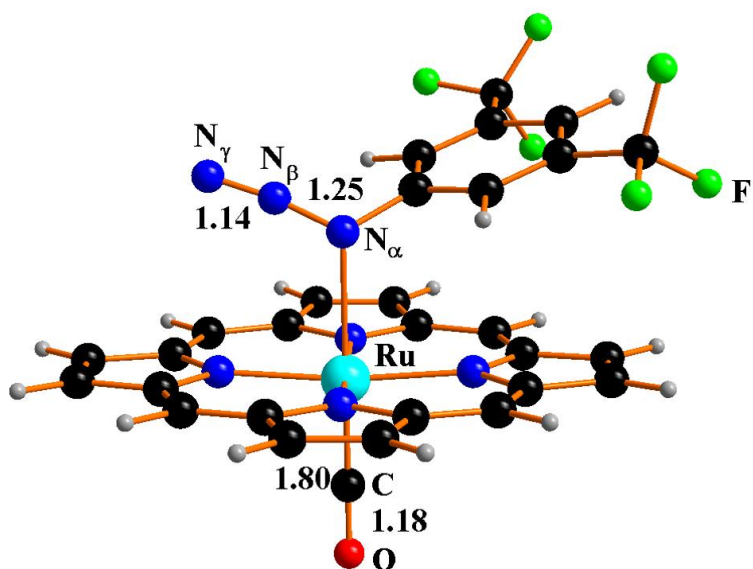

**Figure S13:** Optimised structure of compound  $[\text{Ru}](\text{Ar}'\text{N}_3)(\text{CO})_{\text{TS}}$

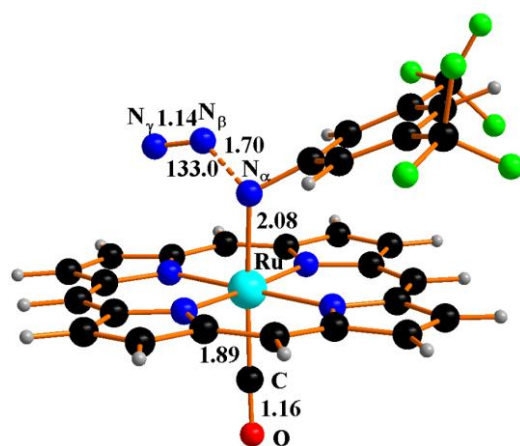

**Figure S14:** Optimised structure of compound  $[\text{Ru}](\text{NAr}')(\text{CO})_5$

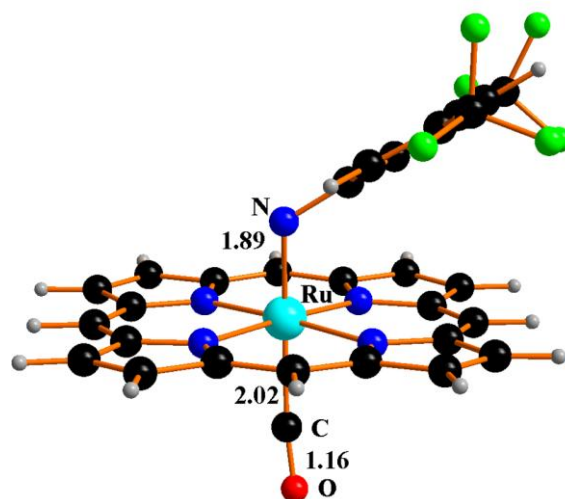

**Figure S15:** Optimised structure of compound  $[\text{Ru}](\text{NAr}')(\text{CO})_{\text{T}}$

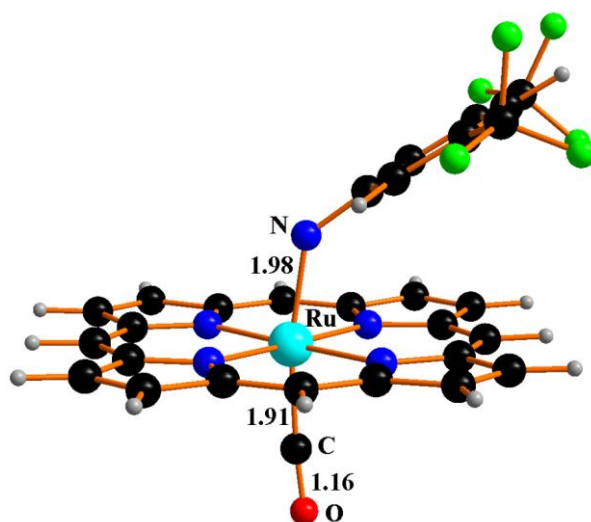

**Figure S17:** Optimised structure of a) **1b** and b) **1b'** from  $\alpha$ -methylstyrene and  $\text{Ar}'\text{N}_3$ .

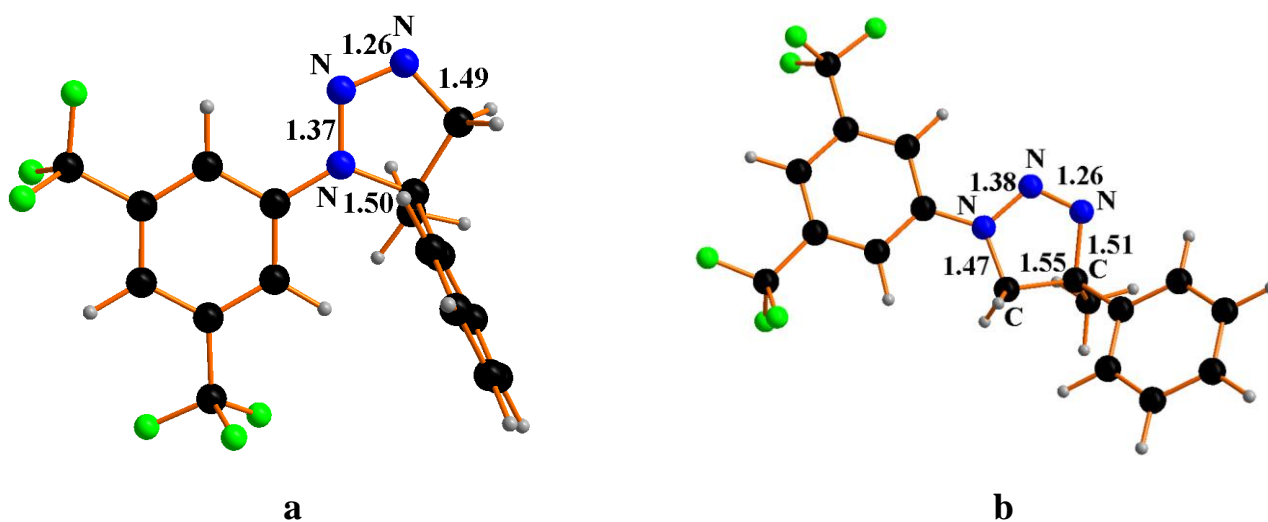

**Figure S18:** Optimised structure of  $\delta_{TS}'$  from  $\alpha$ -methylstyrene  $Ar^2N_3$ .

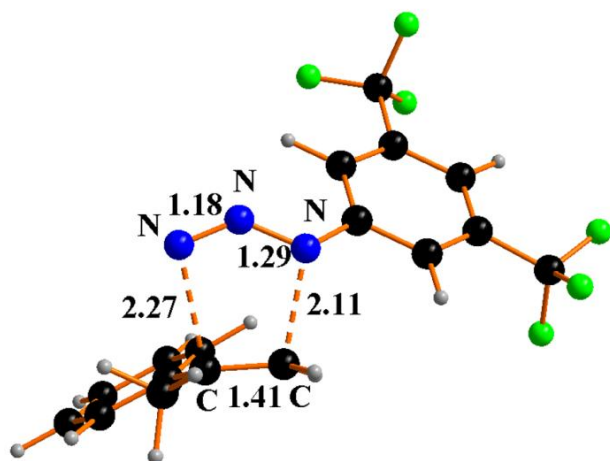

**COORDINATES, ENERGIES AND THERMAL PARAMETERS OF ALL THE OPTIMISED STRUCTURES at the B97D level of theory**

**Compound [Ru](CO)**

Cartesian Coordinates

Ru -0.010515 -0.064575 -0.064257  
O -0.049065 -0.048000 -3.020049  
N 2.053464 -0.114348 0.101813  
N 0.040740 1.996300 0.139213  
C -2.389855 2.432549 0.183979  
C 2.373545 -2.563719 0.096956  
C -1.050815 2.844974 0.170752  
H 5.145934 1.173157 0.147118  
C 4.277739 0.519055 0.124885  
C 0.781136 4.186829 0.188943  
C 1.172177 2.791701 0.141640  
C 2.902441 0.977415 0.109936  
H -1.246005 5.087439 0.249812  
C 4.244609 -0.854370 0.117994  
C 2.490050 2.316492 0.121141  
C -0.033599 -0.054904 -1.839163  
C -0.592187 4.219796 0.206997  
C 2.848918 -1.245752 0.098825  
H 1.477220 5.021740 0.213988  
H 5.079920 -1.550255 0.133489  
C 1.034528 -2.976143 0.112907  
N -0.057338 -2.127257 0.118156  
C -2.865206 1.114579 0.183580  
N -2.070120 -0.016680 0.154734  
C -2.918760 -1.108543 0.172005  
C -4.293227 -0.650560 0.226049  
C -4.260073 0.722861 0.233186  
H -5.094639 1.418441 0.276795  
H -5.160709 -1.304966 0.262747  
C -2.506393 -2.447594 0.158752  
C -1.188484 -2.922783 0.141153  
C -0.796580 -4.318273 0.163705  
H -1.491946 -5.153464 0.197727  
C 0.576751 -4.351312 0.146304  
H 1.231290 -5.219298 0.163364  
H 3.279290 3.069089 0.127066  
H 3.126196 -3.352924 0.095436  
H -3.295329 -3.200319 0.176290  
H -3.142202 3.221625 0.209635



## Energy parameters

HF=-1196.2144935

Zero-point vibrational energy 726560.5 (Joules/Mol)

Zero-point correction= 0.276732 (Hartree/Particle)

Thermal correction to Energy= 0.296265

Thermal correction to Enthalpy= 0.297209

Thermal correction to Gibbs Free Energy= 0.230227

Sum of electronic and zero-point Energies= -1195.937761

Sum of electronic and thermal Energies= -1195.918228

Sum of electronic and thermal Enthalpies= -1195.917284

Sum of electronic and thermal Free Energies= -1195.984266

## Compound [Ru](CO)(Ar'N<sub>3</sub>)

### Cartesian Coordinates

|                                 |                                 |
|---------------------------------|---------------------------------|
| Ru -0.007244 -0.178093 0.135471 | H 3.366460 2.730223 1.049776    |
| O 0.241440 0.295264 -2.791296   | H 2.987703 -3.595631 0.013024   |
| N 2.044284 -0.342627 0.393639   | H -3.406388 -3.142991 -0.410001 |
| N 0.104817 1.837041 0.620363    | H -3.026329 3.187124 0.624665   |
| C -2.303771 2.376008 0.529127   | N -0.207640 -0.495850 2.542910  |
| C 2.267613 -2.778222 0.063956   | N -1.330286 -0.189893 3.002696  |
| C -0.955141 2.715861 0.714237   | N -2.422668 0.001052 3.285041   |
| H 5.160724 0.773905 0.880036    | C 0.945033 -0.054466 3.275966   |
| C 4.275410 0.174562 0.683938    | C 2.015379 -0.956007 3.358888   |
| C 0.914271 3.941380 1.120379    | C 1.043376 1.248737 3.781443    |
| C 1.258940 2.559535 0.849903    | C 3.203018 -0.537373 3.970669   |
| C 2.923207 0.694096 0.636762    | H 1.917287 -1.951090 2.933960   |
| H -1.078261 4.916636 1.182723   | C 2.240448 1.643393 4.396652    |
| C 4.195319 -1.177762 0.461136   | H 0.219347 1.948788 3.663968    |
| C 2.556529 2.029954 0.844925    | C 3.326319 0.760996 4.491903    |
| C 0.146023 0.105389 -1.633452   | H 4.254829 1.079237 4.961787    |
| C -0.454003 4.038337 1.037241   | C 4.370860 -1.488092 4.131705   |
| C 2.793124 -1.495903 0.278114   | C 2.413891 3.065963 4.884035    |
| H 1.634097 4.722017 1.352733    | F 4.193714 -2.669256 3.477657   |
| H 5.001138 -1.906736 0.441462   | F 4.576297 -1.792063 5.455498   |
| C 0.916271 -3.125220 -0.078717  | F 5.540670 -0.942470 3.678559   |
| N -0.139472 -2.237753 -0.048209 | F 3.063338 3.118916 6.086541    |
| C -2.825679 1.104142 0.255642   | F 1.228818 3.722019 5.036195    |
| N -2.076709 -0.050124 0.127285  | F 3.166980 3.803464 4.003309    |
| C -2.958112 -1.089524 -0.092807 |                                 |
| C -4.314066 -0.574158 -0.101693 |                                 |
| C -4.231962 0.780510 0.112553   |                                 |
| H -5.041239 1.503215 0.182066   |                                 |
| H -5.204413 -1.181605 -0.244749 |                                 |
| C -2.592514 -2.434069 -0.254217 |                                 |
| C -1.296165 -2.968240 -0.225277 |                                 |
| C -0.960058 -4.373686 -0.363938 |                                 |
| H -1.685799 -5.170601 -0.506890 |                                 |
| C 0.406895 -4.470868 -0.272648  |                                 |
| H 1.025849 -5.363192 -0.326247  |                                 |

## Energy parameters

HF=-2265.5900791

Zero-point vibrational energy 1016100.2 (Joules/Mol)

Zero-point correction= 0.387012 (Hartree/Particle)

Thermal correction to Energy= 0.422830

Thermal correction to Enthalpy= 0.423774

Thermal correction to Gibbs Free Energy= 0.319134

Sum of electronic and zero-point Energies= -2265.203067

Sum of electronic and thermal Energies= -2265.167249

Sum of electronic and thermal Enthalpies= -2265.166305

Sum of electronic and thermal Free Energies= -2265.270945

## Compound [Ru](CO)(Ar'N<sub>3</sub>)<sub>TS</sub>

### Cartesian Coordinates

|                                 |                                |
|---------------------------------|--------------------------------|
| Ru -0.084105 0.481508 0.401698  | H 1.860412 4.479034 -0.501557  |
| O -0.534745 -0.271042 -2.523696 | H 3.993403 -1.531348 0.233789  |
| N 1.859311 1.125510 0.095864    | H -2.001678 -3.511792 1.422141 |
| N -0.760740 2.397521 0.168735   | H -4.169281 2.460783 0.475539  |
| C -3.189610 1.982228 0.481897   | N 0.078251 0.603717 2.469876   |
| C 3.013196 -1.055763 0.270334   | N 0.035237 2.204196 3.046354   |
| C -2.097799 2.803633 0.180135   | N -0.564997 3.120802 2.744337  |
| H 4.285411 3.354361 -0.483267   | C 1.154110 -0.027560 3.119539  |
| C 3.705250 2.454180 -0.296413   | C 0.887245 -1.302829 3.664611  |
| C -0.873464 4.643030 -0.352136  | C 2.464260 0.493777 3.176104   |
| C 0.001486 3.509189 -0.160526   | C 1.936138 -2.066984 4.190769  |
| C 2.261550 2.420200 -0.146105   | H -0.127316 -1.690937 3.626862 |
| H -3.082100 4.786593 -0.192125  | C 3.485797 -0.257465 3.769252  |
| C 4.153387 1.163399 -0.162944   | H 2.667741 1.470214 2.744794   |
| C 1.397952 3.518643 -0.272587   | C 3.240166 -1.550476 4.260747  |
| C -0.367449 0.030316 -1.410599  | H 4.046281 -2.140627 4.692462  |
| C -2.162664 4.208722 -0.143912  | C 1.683891 -3.447696 4.754826  |
| C 2.989372 0.330742 0.073972    | C 4.905643 0.262854 3.788550   |
| H -0.535579 5.644598 -0.606490  | F 1.848376 -3.471484 6.118622  |
| H 5.174324 0.793830 -0.211347   | F 2.562642 -4.371215 4.249548  |
| C 1.920741 -1.897641 0.533521   | F 0.427284 -3.911746 4.500961  |
| N 0.616461 -1.480871 0.638878   | F 5.677003 -0.357329 2.832472  |
| C -3.160157 0.613095 0.798413   | F 5.523105 0.029229 4.988519   |
| N -2.028411 -0.158791 0.816973  | F 4.988242 1.602301 3.549442   |
| C -2.401039 -1.447749 1.127450  |                                |
| C -3.839596 -1.484567 1.343491  |                                |
| C -4.309798 -0.211584 1.136636  |                                |
| H -5.333005 0.149929 1.201773   |                                |
| H -4.400858 -2.376259 1.611635  |                                |
| C -1.540578 -2.554214 1.177699  |                                |
| C -0.153613 -2.577453 0.944612  |                                |
| C 0.700778 -3.745994 1.031046   |                                |
| H 0.355711 -4.747154 1.275696   |                                |
| C 1.984469 -3.325355 0.777164   |                                |
| H 2.897956 -3.914214 0.769765   |                                |

### Energy parameters

HF=-2265.5541417

Zero-point vibrational energy 1006246.2 (Joules/Mol)

Zero-point correction= 0.383259 (Hartree/Particle)

Thermal correction to Energy= 0.419010

Thermal correction to Enthalpy= 0.419954

Thermal correction to Gibbs Free Energy= 0.315732

Sum of electronic and zero-point Energies= -2265.170883

Sum of electronic and thermal Energies= -2265.135132

Sum of electronic and thermal Enthalpies= -2265.134188

Sum of electronic and thermal Free Energies= -2265.238410

### Compound [Ru](CO)(NAr')<sub>s</sub>

#### Cartesian Coordinates

|                                 |                                |
|---------------------------------|--------------------------------|
| Ru -0.052590 0.452877 0.474762  | C -1.550655 -2.595670 1.085878 |
| O -0.518869 -0.326829 -2.565423 | C -0.164330 -2.622470 0.848926 |
| N 1.868301 1.081517 0.040925    | C 0.682144 -3.798570 0.901165  |
| N -0.717156 2.398667 0.288980   | H 0.332279 -4.801151 1.134450  |
| C -3.139870 1.997262 0.657609   | C 1.966194 -3.387653 0.625306  |
| C 3.001610 -1.122583 0.098502   | H 2.871522 -3.987713 0.582862  |
| C -2.033831 2.817500 0.397494   | H 1.927814 4.476052 -0.264708  |
| H 4.309027 3.295979 -0.516355   | H 3.975003 -1.605779 0.013671  |
| C 3.718445 2.397340 -0.356718   | H -2.015685 -3.556412 1.309337 |
| C -0.794773 4.688347 0.034197   | H -4.105454 2.499007 0.725889  |
| C 0.058117 3.516093 0.066962    | N 0.066340 0.436282 2.360776   |
| C 2.286249 2.383932 -0.134239   | C 1.110741 -0.135434 3.033235  |
| H -2.994605 4.849209 0.278725   | C 0.865466 -1.326705 3.777167  |
| C 4.146531 1.091880 -0.320788   | C 2.420588 0.419227 3.033042   |
| C 1.449324 3.508891 -0.109854   | C 1.923771 -1.977123 4.413089  |
| C -0.403939 0.023300 -1.469259  | H -0.138558 -1.743695 3.778240 |
| C -2.084009 4.256988 0.236086   | C 3.436348 -0.198592 3.769716  |
| C 2.982536 0.266884 -0.073295   | H 2.610197 1.330117 2.473419   |
| H -0.440737 5.704114 -0.123727  | C 3.215340 -1.415882 4.436517  |
| H 5.157049 0.708985 -0.436650   | H 4.025517 -1.913398 4.965448  |
| C 1.912803 -1.957474 0.400522   | C 1.708276 -3.293631 5.127342  |
| N 0.614806 -1.530688 0.541924   | C 4.837098 0.374003 3.741745   |
| C -3.139911 0.606152 0.861308   | F 1.923186 -3.179848 6.478117  |
| N -2.027232 -0.188538 0.805075  | F 2.579908 -4.255156 4.680801  |
| C -2.407705 -1.482687 1.067579  | F 0.450154 -3.794123 4.966304  |
| C -3.842986 -1.508546 1.303642  | F 5.610045 -0.243304 2.785157  |
| C -4.296221 -0.217485 1.174164  | F 5.490594 0.203465 4.931883   |
| H -5.312047 0.155193 1.279477   | F 4.859644 1.708500 3.459917   |
| H -4.414606 -2.402827 1.539686  |                                |

### Energy parameters

HF=-2156.1216913

Zero-point vibrational energy 985661.9 (Joules/Mol)

Zero-point correction= 0.375419 (Hartree/Particle)

Thermal correction to Energy= 0.409593

Thermal correction to Enthalpy= 0.410537  
 Thermal correction to Gibbs Free Energy= 0.306487  
 Sum of electronic and zero-point Energies= -2155.746273  
 Sum of electronic and thermal Energies= -2155.712098  
 Sum of electronic and thermal Enthalpies= -2155.711154  
 Sum of electronic and thermal Free Energies= -2155.815205

### Compound [Ru](CO)(NAr')<sub>T</sub>

#### Cartesian Coordinates

|                                 |                                |
|---------------------------------|--------------------------------|
| Ru -0.153354 0.415224 0.365732  | C -1.670561 -2.623078 1.000132 |
| O -0.367259 -0.100436 -2.656729 | C -0.279508 -2.659843 0.801142 |
| N 1.817177 1.037982 0.034367    | C 0.564171 -3.837285 0.894948  |
| N -0.795400 2.377382 0.252806   | H 0.205156 -4.838945 1.117652  |
| C -3.205754 2.002474 0.639361   | C 1.855816 -3.424734 0.671337  |
| C 2.920330 -1.166141 0.202582   | H 2.764304 -4.021732 0.673672  |
| C -2.094590 2.820097 0.384156   | H 1.876619 4.423676 -0.308186  |
| H 4.280282 3.245248 -0.422900   | H 3.892517 -1.659192 0.179133  |
| C 3.681862 2.349165 -0.278463   | H -2.153384 -3.577213 1.213540 |
| C -0.829257 4.669858 0.007375   | H -4.169636 2.505407 0.722140  |
| C 0.001706 3.480466 0.020538    | N 0.320164 0.491140 2.283440   |
| C 2.236850 2.334927 -0.138152   | C 1.269359 -0.075047 3.046382  |
| H -3.020608 4.872171 0.293112   | C 1.029305 -1.343860 3.661558  |
| C 4.108153 1.046028 -0.181040   | C 2.553811 0.536828 3.182279   |
| C 1.393810 3.458393 -0.152842   | C 2.060209 -1.979325 4.350505  |
| C -0.331236 0.126508 -1.516717  | H 0.055424 -1.810042 3.538045  |
| C -2.122651 4.262466 0.230450   | C 3.558265 -0.123019 3.892662  |
| C 2.927363 0.226239 0.018182    | H 2.736761 1.489867 2.692692   |
| H -0.457671 5.679633 -0.148678  | C 3.331959 -1.383638 4.476181  |
| H 5.124377 0.662866 -0.226214   | H 4.128310 -1.893265 5.014545  |
| C 1.810563 -1.993062 0.437649   | C 1.851509 -3.343405 4.974084  |
| N 0.504476 -1.568637 0.515765   | C 4.951099 0.467649 3.956960   |
| C -3.209999 0.609192 0.807468   | F 2.025963 -3.306197 6.334110  |
| N -2.098524 -0.199346 0.738174  | F 2.756557 -4.256336 4.495426  |
| C -2.507439 -1.497533 0.967974  | F 0.609955 -3.855335 4.744909  |
| C -3.941601 -1.507725 1.193791  | F 5.777838 -0.112287 3.023987  |
| C -4.375566 -0.208140 1.093078  | F 5.540940 0.265530 5.174617   |
| H -5.386362 0.176455 1.204517   | F 4.970740 1.809682 3.718602   |
| H -4.526143 -2.399955 1.404166  |                                |

#### Energy parameters

HF=-2156.1308337

Zero-point vibrational energy 985975.4 (Joules/Mol)

Zero-point correction= 0.375538 (Hartree/Particle)

Thermal correction to Energy= 0.409573

Thermal correction to Enthalpy= 0.410517

Thermal correction to Gibbs Free Energy= 0.307026

Sum of electronic and zero-point Energies= -2155.755295

Sum of electronic and thermal Energies= -2155.721261

Sum of electronic and thermal Enthalpies= -2155.720317

Sum of electronic and thermal Free Energies= -2155.823807

**Compound [Ru](CO)(Ar'N)•••H<sub>2</sub>C=C(Me)Ph, 5<sub>TS</sub>**

## Cartesian Coordinates

|    |         |         |         |   |         |         |         |
|----|---------|---------|---------|---|---------|---------|---------|
| Ru | -2.0883 | 0.2286  | 0.4580  | C | 0.5081  | -2.4526 | -1.9800 |
| N  | -2.4970 | -1.8133 | 0.5272  | C | -0.4519 | -1.4818 | -2.2427 |
| N  | -3.2116 | 0.3801  | -1.2788 | C | -3.5760 | 0.6050  | 1.5693  |
| C  | -2.8405 | 2.7803  | -1.7355 | O | -4.4573 | 0.8550  | 2.2925  |
| C  | -1.1527 | -2.3711 | 2.5244  | H | -1.4955 | -1.7161 | -2.0527 |
| C  | -3.4058 | 1.5268  | -2.0181 | H | -0.2660 | -0.6447 | -2.9140 |
| H  | -3.9610 | -4.6762 | -0.3907 | C | 0.0639  | -3.7031 | -1.2509 |
| C  | -3.3839 | -3.8995 | 0.1049  | H | 0.3178  | -4.6130 | -1.8207 |
| C  | -4.6255 | -0.0981 | -3.0376 | H | 0.5569  | -3.7927 | -0.2687 |
| C  | -3.9463 | -0.6267 | -1.8684 | H | -1.0193 | -3.6707 | -1.0895 |
| C  | -3.3327 | -2.5094 | -0.3165 | C | 0.9009  | 0.2296  | -0.2603 |
| H  | -4.6040 | 1.9551  | -3.8792 | C | 1.7411  | -0.6829 | 0.4350  |
| C  | -2.5772 | -4.0126 | 1.2116  | C | 1.4104  | 1.4964  | -0.6358 |
| C  | -4.0050 | -1.9564 | -1.4191 | C | 3.0586  | -0.3309 | 0.7269  |
| C  | -4.2896 | 1.2311  | -3.1314 | H | 1.3331  | -1.6437 | 0.7330  |
| C  | -2.0260 | -2.6959 | 1.4737  | C | 2.7433  | 1.8138  | -0.3449 |
| H  | -5.2689 | -0.6796 | -3.6935 | H | 0.7629  | 2.1992  | -1.1572 |
| H  | -2.3563 | -4.9023 | 1.7964  | C | 3.5795  | 0.9164  | 0.3339  |
| C  | -0.6191 | -1.1097 | 2.8357  | H | 4.6134  | 1.1767  | 0.5483  |
| N  | -0.8814 | 0.0534  | 2.1509  | C | 3.9582  | -1.2685 | 1.5025  |
| C  | -2.0090 | 3.1170  | -0.6553 | C | 3.2390  | 3.1782  | -0.7417 |
| N  | -1.6088 | 2.2504  | 0.3352  | F | 4.5453  | 3.3821  | -0.4000 |
| C  | -0.7800 | 2.9422  | 1.1893  | F | 2.4872  | 4.1584  | -0.1324 |
| C  | -0.6633 | 4.3142  | 0.7301  | F | 3.1099  | 3.3695  | -2.0946 |
| C  | -1.4123 | 4.4200  | -0.4162 | F | 5.1678  | -1.4462 | 0.8867  |
| H  | -1.5556 | 5.2914  | -1.0505 | F | 4.2475  | -0.7702 | 2.7501  |
| H  | -0.0640 | 5.0782  | 1.2178  | F | 3.4242  | -2.5099 | 1.6904  |
| C  | -0.1179 | 2.3942  | 2.2990  | C | 1.9311  | -2.2409 | -2.2457 |
| C  | -0.1505 | 1.0607  | 2.7363  | C | 2.8900  | -3.2179 | -1.8561 |
| C  | 0.6001  | 0.5153  | 3.8533  | C | 2.4233  | -1.0431 | -2.8408 |
| H  | 1.2653  | 1.0919  | 4.4913  | C | 4.2619  | -3.0020 | -2.0328 |
| C  | 0.3136  | -0.8267 | 3.9121  | H | 2.5559  | -4.1475 | -1.3974 |
| H  | 0.6980  | -1.5687 | 4.6076  | C | 3.7929  | -0.8280 | -3.0125 |
| H  | -4.6291 | -2.6372 | -1.9989 | H | 1.7310  | -0.2635 | -3.1527 |
| H  | -0.8572 | -3.1934 | 3.1772  | C | 4.7246  | -1.8036 | -2.6055 |
| H  | 0.5200  | 3.0738  | 2.8648  | H | 4.9726  | -3.7646 | -1.7110 |
| H  | -3.0755 | 3.5842  | -2.4342 | H | 4.1372  | 0.1061  | -3.4587 |
| N  | -0.3801 | -0.1335 | -0.5597 | H | 5.7943  | -1.6285 | -2.7280 |

**Energy parameters**

HF=-2504.87146062

Zero-point vibrational energy 151253.2 (Joules/Mol)

Zero-point correction= 0.521257 (Hartree/Particle)

Thermal correction to Energy= 0.5423995

Thermal correction to Enthalpy= 0.5620939

Thermal correction to Gibbs Free Energy= 0.4512661

Sum of electronic and zero-point Energies= -2504.331416

Sum of electronic and thermal Energies= -2504.283688

Sum of electronic and thermal Enthalpies= -2504.274234

Sum of electronic and thermal Free Energies= -2504.431532

**Compound [Ru](CO)(Ar'NCH<sub>2</sub>C(Me)Ph)<sub>T</sub>, 6<sub>T</sub>**

Cartesian Coordinates

|                                 |                                 |
|---------------------------------|---------------------------------|
| Ru -2.002730 0.298416 0.484631  | C 0.284220 -2.250386 -2.023898  |
| N -2.805105 -1.606817 0.248321  | C -0.533988 -0.975598 -1.993345 |
| N -3.020248 0.922908 -1.215434  | C -3.454258 0.793891 1.600292   |
| C -2.150886 3.232716 -1.318322  | O -4.346102 1.097487 2.287719   |
| C -1.658291 -2.708504 2.137102  | H -1.595847 -1.199119 -2.128138 |
| C -2.936718 2.169852 -1.793269  | H -0.229632 -0.276441 -2.792982 |
| H -4.791329 -3.944030 -1.082059 | C -0.389723 -3.472247 -1.458116 |
| C -4.084095 -3.382622 -0.476414 | H -0.094411 -4.389424 -1.990650 |
| C -4.401169 0.980190 -3.061600  | H -0.133319 -3.618775 -0.391309 |
| C -3.906073 0.174099 -1.960490  | H -1.481596 -3.376299 -1.505368 |
| C -3.738716 -1.989447 -0.690213 | C 0.902832 0.102382 -0.333621   |
| H -3.919490 3.076132 -3.609155  | C 1.659466 -0.778257 0.456473   |
| C -3.349509 -3.817586 0.600978  | C 1.438876 1.334695 -0.739094   |
| C -4.247601 -1.163685 -1.705754 | C 2.964640 -0.426182 0.820270   |
| C -3.798567 2.211330 -2.961163  | H 1.220890 -1.719632 0.772665   |
| C -2.552552 -2.693276 1.054591  | C 2.745438 1.672598 -0.361874   |
| H -5.111267 0.635360 -3.809335  | H 0.831463 2.012390 -1.333059   |
| H -3.335361 -4.806636 1.052450  | C 3.518762 0.798470 0.416903    |
| C -0.898234 -1.636761 2.631127  | H 4.535358 1.064215 0.700785    |
| N -0.908501 -0.356302 2.126603  | C 3.803473 -1.346547 1.677080   |
| C -1.330426 3.243997 -0.179278  | C 3.350933 2.996608 -0.767773   |
| N -1.142514 2.180235 0.673238   | F 2.582108 3.688867 -1.656269   |
| C -0.248350 2.575014 1.644731   | F 4.583417 2.833525 -1.349418   |
| C 0.139537 3.951874 1.402882    | F 3.546237 3.818331 0.315473    |
| C -0.526115 4.364793 0.274854   | F 5.040103 -1.566254 1.127008   |
| H -0.477141 5.331037 -0.221238  | F 4.028614 -0.809245 2.922109   |
| H 0.845135 4.510306 2.012483    | F 3.231919 -2.568537 1.872347   |
| C 0.251401 1.754360 2.666086    | C 1.675355 -2.250537 -2.375726  |
| C -0.039129 0.398846 2.881976   | C 2.495346 -3.402684 -2.129222  |
| C 0.553301 -0.440203 3.906526   | C 2.334867 -1.105562 -2.934900  |
| H 1.287525 -0.102274 4.633284   | C 3.867008 -3.394417 -2.395384  |
| C 0.024214 -1.698211 3.751121   | H 2.049027 -4.295427 -1.693770  |
| H 0.236106 -2.594739 4.328622   | C 3.705135 -1.106436 -3.199322  |
| H -4.971862 -1.617303 -2.383040 | H 1.768025 -0.202174 -3.149913  |
| H -1.550106 -3.658946 2.660910  | C 4.489132 -2.247546 -2.929189  |
| H 0.968628 2.211565 3.348158    | H 4.460353 -4.283827 -2.175760  |
| H -2.190124 4.157791 -1.894603  | H 4.170093 -0.210341 -3.614148  |
| N -0.413995 -0.248122 -0.707622 | H 5.561588 -2.241233 -3.127482  |

**Energy parameters**

HF=-2504.897573

Zero-point vibrational energy 1410567.2 (Joules/Mol)

Zero-point correction= 0.537257 (Hartree/Particle)

Thermal correction to Energy= 0.579995

Thermal correction to Enthalpy= 0.580939

|                                              |              |
|----------------------------------------------|--------------|
| Thermal correction to Gibbs Free Energy=     | 0.459661     |
| Sum of electronic and zero-point Energies=   | -2504.360316 |
| Sum of electronic and thermal Energies=      | -2504.317578 |
| Sum of electronic and thermal Enthalpies=    | -2504.316634 |
| Sum of electronic and thermal Free Energies= | -2504.437912 |

### Compound [Ru](4b)(CO), 7

#### Cartesian Coordinates

|                                 |                                 |
|---------------------------------|---------------------------------|
| Ru 1.866067 0.325834 -0.608376  | C 0.277225 -1.255745 2.235622   |
| N 2.513066 -1.636795 -0.767234  | C 0.493384 0.202185 2.479446    |
| N 3.278850 0.655445 0.874548    | C 3.023210 0.867482 -1.888585   |
| C 2.644546 2.967277 1.467867    | O 3.773438 1.225605 -2.720759   |
| C 0.863952 -2.427319 -2.426714  | H 1.512947 0.547085 2.642255    |
| C 3.457107 1.828426 1.580606    | H -0.280809 0.792724 2.970844   |
| H 4.590162 -4.213985 -0.281277  | C 1.490197 -2.165589 2.222240   |
| C 3.789455 -3.552321 -0.602984  | H 1.552240 -2.680813 3.192360   |
| C 5.161633 0.456321 2.195654    | H 1.428136 -2.918410 1.426742   |
| C 4.316090 -0.191851 1.210574   | H 2.397101 -1.580034 2.072806   |
| C 3.644363 -2.169508 -0.186745  | C -1.100885 0.057831 0.593077   |
| H 4.984940 2.471577 3.108530    | C -1.751226 -0.930376 -0.162951 |
| C 2.740383 -3.830419 -1.445982  | C -1.720087 1.291869 0.819410   |
| C 4.491014 -1.489372 0.702325   | C -3.030703 -0.686614 -0.667296 |
| C 4.625211 1.699770 2.432276    | H -1.249230 -1.873125 -0.351178 |
| C 1.959897 -2.611549 -1.568448  | C -3.003457 1.526819 0.298975   |
| H 6.044519 0.006423 2.643461    | H -1.201807 2.066898 1.377667   |
| H 2.515938 -4.762098 -1.959877  | C -3.672000 0.543576 -0.441470  |
| C 0.162212 -1.235483 -2.662908  | H -4.669983 0.727109 -0.833886  |
| N 0.390152 -0.042258 -2.013114  | C -3.786512 -1.773684 -1.395331 |
| C 1.573709 3.163924 0.580929    | C -3.657367 2.876963 0.477368   |
| N 1.118827 2.236432 -0.331544   | F -3.141549 3.582936 1.526325   |
| C 0.123375 2.836746 -1.072987   | F -5.006579 2.775529 0.688539   |
| C -0.080286 4.190018 -0.592312  | F -3.503643 3.665912 -0.639568  |
| C 0.808720 4.389558 0.436389    | F -4.774649 -2.306212 -0.598957 |
| H 0.950531 5.281880 1.041448    | F -4.415569 -1.306460 -2.518826 |
| H -0.821089 4.879747 -0.987686  | F -2.994777 -2.815151 -1.780853 |
| C -0.603712 2.214081 -2.098465  | C -1.022586 -1.917449 2.623526  |
| C -0.493429 0.884400 -2.525945  | C -1.957366 -1.306232 3.482080  |
| C -1.319152 0.248444 -3.535002  | C -1.338045 -3.179029 2.072895  |
| H -2.112461 0.746028 -4.086981  | C -3.181146 -1.931954 3.774142  |
| C -0.918246 -1.061816 -3.615781 | H -1.737002 -0.338994 3.931799  |
| H -1.317308 -1.851138 -4.247406 | C -2.560698 -3.804410 2.357853  |
| H 5.355131 -2.043085 1.071062   | H -0.631055 -3.666468 1.401766  |
| H 0.551405 -3.295911 -3.007606  | C -3.490418 -3.180207 3.208153  |
| H -1.366688 2.819986 -2.586710  | H -3.891173 -1.441189 4.441387  |
| H 2.899768 3.809440 2.112297    | H -2.790205 -4.772247 1.909786  |
| N 0.213842 -0.225849 1.089647   | H -4.444640 -3.661430 3.426786  |

#### Energy parameters

HF=-2504.9423569

Zero-point vibrational energy 1421023.4 (Joules/Mol)  
 Zero-point correction= 0.541239 (Hartree/Particle)  
 Thermal correction to Energy= 0.582907  
 Thermal correction to Enthalpy= 0.583851  
 Thermal correction to Gibbs Free Energy= 0.467071  
 Sum of electronic and zero-point Energies= -2504.401118  
 Sum of electronic and thermal Energies= -2504.359450  
 Sum of electronic and thermal Enthalpies= -2504.358506  
 Sum of electronic and thermal Free Energies= -2504.475286

### Compound of the 1,3-cycloaddition between Ar'N<sub>3</sub> and $\alpha$ -methylstyrene, 8<sub>TS</sub>

#### Cartesian Coordinates

|                                |                                |
|--------------------------------|--------------------------------|
| N -2.875680 -0.246517 1.147513 | C -1.439333 -0.381335 4.405147 |
| C -1.957525 -1.640342 2.289956 | C -1.582759 -0.255134 5.810670 |
| C -2.246611 -1.355453 3.644077 | C -0.564651 0.527320 3.750293  |
| H -2.436836 -2.514457 1.845307 | C -0.879897 0.723992 6.527454  |
| N -3.572847 0.394981 1.874280  | H -2.249810 -0.924051 6.351560 |
| N -3.963130 0.257810 3.097625  | C 0.142399 1.499469 4.467720   |
| H -0.980068 -1.388870 1.880076 | H -0.454292 0.492131 2.667146  |
| C -3.211216 -2.261037 4.386310 | C -0.013005 1.606573 5.861830  |
| H -2.643217 -3.006683 4.969372 | H -1.019149 0.801806 7.606552  |
| H -3.848914 -1.707947 5.088357 | H 0.799143 2.189006 3.935458   |
| H -3.855533 -2.796080 3.676965 | H 0.524855 2.375289 6.417747   |
| C -3.947299 1.355415 3.954035  | C -2.255151 4.744140 4.500014  |
| C -3.175473 2.520337 3.722089  | C -5.118034 1.935362 7.533101  |
| C -4.606391 1.192832 5.190743  | F -5.337351 3.088506 8.229036  |
| C -3.070994 3.488604 4.723474  | F -4.316834 1.145105 8.325296  |
| H -2.656270 2.642863 2.774604  | F -6.319301 1.289413 7.435593  |
| C -4.481368 2.176134 6.182306  | F -1.533045 4.715652 3.343512  |
| H -5.198861 0.296919 5.365606  | F -1.365861 4.959646 5.520667  |
| C -3.712824 3.328557 5.965398  | F -3.054305 5.858582 4.444061  |
| H -3.613863 4.084862 6.740351  |                                |

#### Energy parameters

HF=-1418.0567833

Zero-point vibrational energy 702878.8 (Joules/Mol)  
 Zero-point correction= 0.267712 (Hartree/Particle)  
 Thermal correction to Energy= 0.290832  
 Thermal correction to Enthalpy= 0.291776  
 Thermal correction to Gibbs Free Energy= 0.213024  
 Sum of electronic and zero-point Energies= -1417.789071  
 Sum of electronic and thermal Energies= -1417.765952  
 Sum of electronic and thermal Enthalpies= -1417.765007  
 Sum of electronic and thermal Free Energies= -1417.843759



## Triazoline from the 1,3-cycloaddition between Ar'N<sub>3</sub> and $\alpha$ -methylstyrene, 1b

### Cartesian Coordinates

|                                |                                |
|--------------------------------|--------------------------------|
| N 0.063668 -0.035560 2.362697  | C -2.416328 -1.173431 4.704526 |
| C -0.890498 -1.140456 2.648820 | C -3.615604 -1.879334 4.916722 |
| C -2.105742 -0.480678 3.376048 | C -1.466620 -1.113650 5.746314 |
| H -1.179647 -1.627600 1.707501 | C -3.862485 -2.510887 6.149435 |
| N -0.312931 1.024711 2.924315  | H -4.367339 -1.935736 4.130633 |
| N -1.495756 0.874701 3.604396  | C -1.712011 -1.740629 6.976123 |
| H -0.371684 -1.879544 3.277688 | H -0.539728 -0.558125 5.594998 |
| C -3.301661 -0.341108 2.412193 | C -2.914597 -2.442161 7.182949 |
| H -3.647798 -1.337763 2.104646 | H -4.798637 -3.050745 6.298851 |
| H -4.140970 0.197601 2.869882  | H -0.970242 -1.676287 7.773430 |
| H -2.974964 0.204242 1.516322  | H -3.110018 -2.926150 8.140718 |
| C -2.074814 1.968244 4.258741  | C -5.151941 2.697341 6.372269  |
| C -3.296619 1.821977 4.947069  | C -1.366497 5.674627 4.905581  |
| C -1.434800 3.233571 4.251109  | F -2.130922 6.587175 4.221806  |
| C -3.865751 2.922780 5.606243  | F -0.134242 5.676293 4.324657  |
| H -3.801966 0.863068 4.983370  | F -1.212749 6.175328 6.172758  |
| C -2.022365 4.309046 4.922393  | F -5.789202 3.858294 6.696214  |
| H -0.493962 3.359125 3.724757  | F -4.922927 2.027465 7.549074  |
| C -3.243574 4.176080 5.609792  | F -6.043620 1.934143 5.664070  |
| H -3.688056 5.022533 6.126890  |                                |

### Energy parameters

HF=-1418.1001112

Zero-point vibrational energy 713258.6 (Joules/Mol)

Zero-point correction= 0.271666 (Hartree/Particle)

Thermal correction to Energy= 0.294217

Thermal correction to Enthalpy= 0.295161

Thermal correction to Gibbs Free Energy= 0.216688

Sum of electronic and zero-point Energies= -1417.828445

Sum of electronic and thermal Energies= -1417.805894

Sum of electronic and thermal Enthalpies= -1417.804950

Sum of electronic and thermal Free Energies= -1417.883424

### Compound [Ru](1b)(CO), 9

#### Cartesian Coordinates

|                                |                                |
|--------------------------------|--------------------------------|
| Ru 2.752922 -0.487329 0.168936 | C 1.365051 -3.123169 -0.682347 |
| N 1.622663 -2.223813 0.327020  | H 4.159214 -0.256296 -4.943172 |
| N 3.028161 -0.861405 -1.852744 | C 0.190129 -3.851406 1.119759  |
| C 4.261624 1.196027 -2.438739  | C 1.841767 -3.020698 -1.997693 |
| C 0.865075 -1.954417 2.662513  | C 3.701386 -0.682570 -4.053660 |
| C 3.696186 -0.051835 -2.744639 | C 0.914099 -2.631953 1.434461  |
| H 0.102380 -4.990439 -0.781470 | H 2.819377 -2.615786 -4.694055 |
| C 0.472173 -4.157264 -0.188866 | H -0.456456 -4.383983 1.812832 |
| C 3.026577 -1.872339 -3.927984 | C 1.496954 -0.745959 2.994139  |
| C 2.603044 -1.975537 -2.542259 | N 2.278764 0.000516 2.139479   |

|                                 |                                 |
|---------------------------------|---------------------------------|
| C 4.259262 1.849022 -1.196566   | C -3.896120 -2.047283 -0.238027 |
| N 3.689032 1.356739 -0.042573   | H -1.735396 -2.026126 -0.349311 |
| C 3.909127 2.281848 0.956109    | C -4.982051 0.092919 -0.053180  |
| C 4.641101 3.410694 0.409745    | H -3.698879 1.827054 -0.082444  |
| C 4.854885 3.144411 -0.921300   | C -5.082119 -1.303591 -0.115725 |
| H 5.366584 3.758555 -1.658576   | H -6.048827 -1.796645 -0.071586 |
| H 4.940819 4.287111 0.979566    | C -1.640815 3.121688 -0.336808  |
| C 3.459379 2.164419 2.280731    | C -2.256160 4.166808 0.376480   |
| C 2.690235 1.122627 2.825687    | C -1.644337 3.161573 -1.747484  |
| C 2.154714 1.081382 4.174381    | C -2.866665 5.233379 -0.308684  |
| H 2.323184 1.844812 4.930308    | H -2.272411 4.154456 1.465399   |
| C 1.413068 -0.071448 4.276864   | C -2.256083 4.221254 -2.431332  |
| H 0.854834 -0.440836 5.133954   | H -1.180749 2.348534 -2.308464  |
| H 1.559777 -3.823121 -2.680460  | C -2.870763 5.263633 -1.712315  |
| H 0.260080 -2.414966 3.444680   | H -3.341523 6.034967 0.258657   |
| H 3.707049 2.987250 2.952412    | H -2.257836 4.231436 -3.522135  |
| H 4.755973 1.717909 -3.259076   | H -3.350227 6.087449 -2.242478  |
| N 0.848681 0.513290 -0.252806   | C -3.939056 -3.562442 -0.249169 |
| C 0.571064 1.923622 0.101069    | C -6.214168 0.958492 0.106620   |
| C -0.959158 1.952773 0.370902   | F -3.538306 -4.080176 0.958040  |
| N -0.216191 -0.125742 -0.484641 | F -3.105704 -4.093217 -1.194490 |
| N -1.311800 0.631700 -0.285807  | F -5.187628 -4.055415 -0.493726 |
| O 5.304208 -1.867239 0.970867   | F -6.268127 1.946384 -0.841459  |
| C 4.310433 -1.327972 0.651801   | F -6.220375 1.595313 1.323795   |
| H 1.163791 2.207828 0.976156    | F -7.377881 0.255497 0.020205   |
| H 0.870312 2.549501 -0.752081   | C -1.235488 1.827616 1.880840   |
| C -2.561360 -0.017772 -0.229139 | H -0.849408 2.714834 2.400387   |
| C -2.641183 -1.428122 -0.282961 | H -2.308509 1.728888 2.090184   |
| C -3.740682 0.742729 -0.115612  | H -0.705093 0.946719 2.268164   |

### Energy parameters

HF=-2614.3578265

Zero-point vibrational energy 1445630.0 (Joules/Mol)

Zero-point correction= 0.550611 (Hartree/Particle)

Thermal correction to Energy= 0.594241

Thermal correction to Enthalpy= 0.595185

Thermal correction to Gibbs Free Energy= 0.471096

Sum of electronic and zero-point Energies= -2613.807215

Sum of electronic and thermal Energies= -2613.763586

Sum of electronic and thermal Enthalpies= -2613.762642

Sum of electronic and thermal Free Energies= -2613.886730

### Inverted compound from the 1,3-cycloaddition between Ar'N<sub>3</sub> and $\alpha$ -methylstyrene, 8'<sub>TS</sub>

Cartesian Coordinates

|                                |                               |
|--------------------------------|-------------------------------|
| N -3.155416 0.171907 0.849432  | N -3.519314 0.790242 1.792358 |
| C -2.419879 -1.720613 1.857624 | N -3.723919 0.480690 3.029634 |
| C -2.979940 -1.488930 3.130104 | C -3.498663 1.426874 4.040138 |

|   |           |           |          |   |           |           |           |
|---|-----------|-----------|----------|---|-----------|-----------|-----------|
| C | -2.985678 | 2.724871  | 3.807996 | H | -4.215686 | -2.674391 | 1.114287  |
| C | -3.769590 | 1.008060  | 5.359547 | H | -2.975564 | -2.397626 | -0.139002 |
| C | -2.756901 | 3.578518  | 4.893876 | H | -2.760121 | -3.701801 | 1.052498  |
| H | -2.774628 | 3.050172  | 2.791538 | C | -0.974770 | -1.437007 | 1.640494  |
| C | -3.520555 | 1.879044  | 6.429712 | C | -0.307990 | -0.437187 | 2.393587  |
| H | -4.170917 | 0.012365  | 5.537163 | C | -0.228113 | -2.141989 | 0.667301  |
| C | -3.015983 | 3.170181  | 6.214445 | C | 1.052447  | -0.168720 | 2.195877  |
| H | -2.828775 | 3.840779  | 7.049093 | H | -0.863294 | 0.146934  | 3.128286  |
| C | -2.270201 | 4.993832  | 4.654833 | C | 1.137115  | -1.874611 | 0.469903  |
| C | -3.748798 | 1.374678  | 7.839886 | H | -0.711139 | -2.911155 | 0.065713  |
| F | -2.704627 | 0.585675  | 8.257089 | C | 1.785367  | -0.889092 | 1.232946  |
| F | -4.876858 | 0.606775  | 7.937732 | H | 1.539827  | 0.608942  | 2.786284  |
| F | -3.869044 | 2.382566  | 8.750184 | H | 1.691923  | -2.438005 | -0.282157 |
| F | -3.308069 | 5.890688  | 4.708420 | H | 2.844446  | -0.678891 | 1.077047  |
| F | -1.674748 | 5.152119  | 3.437619 | H | -3.944926 | -1.936829 | 3.366696  |
| F | -1.364412 | 5.390895  | 5.599418 | H | -2.338678 | -1.248157 | 3.977957  |
| C | -3.136029 | -2.674302 | 0.911944 |   |           |           |           |

### Energy parameters

HF=-1418.0470151

Zero-point vibrational energy 702473.7 (Joules/Mol)

Zero-point correction= 0.267558 (Hartree/Particle)

Thermal correction to Energy= 0.290835

Thermal correction to Enthalpy= 0.291779

Thermal correction to Gibbs Free Energy= 0.211095

Sum of electronic and zero-point Energies= -1417.779457

Sum of electronic and thermal Energies= -1417.756180

Sum of electronic and thermal Enthalpies= -1417.755236

Sum of electronic and thermal Free Energies= -1417.835920

### Inverted triazoline from the 1,3-cycloaddition between Ar'N<sub>3</sub> and $\alpha$ -methylstyrene, 1b'

Cartesian Coordinates

|   |           |           |          |   |           |           |          |
|---|-----------|-----------|----------|---|-----------|-----------|----------|
| N | -1.922415 | 0.323319  | 1.066750 | C | -3.401067 | 1.496896  | 7.900595 |
| C | -1.702386 | -0.968671 | 1.823985 | F | -3.740278 | 2.433408  | 8.829183 |
| C | -1.945295 | -0.556229 | 3.302320 | F | -2.151718 | 1.037220  | 8.230386 |
| N | -2.430612 | 1.196623  | 1.812090 | F | -4.256246 | 0.435857  | 8.071228 |
| N | -2.578877 | 0.755984  | 3.107214 | F | -4.587519 | 5.388778  | 3.232523 |
| C | -3.031570 | 1.603628  | 4.117401 | F | -3.862208 | 6.057528  | 5.195991 |
| C | -3.556997 | 2.885111  | 3.813339 | F | -5.869611 | 5.190681  | 5.006052 |
| C | -2.980135 | 1.174244  | 5.459170 | C | -2.798237 | -1.944757 | 1.326314 |
| C | -4.012541 | 3.701562  | 4.850024 | H | -3.796932 | -1.531120 | 1.533088 |
| H | -3.599272 | 3.219199  | 2.781080 | H | -2.689904 | -2.107235 | 0.245612 |
| C | -3.449345 | 2.018965  | 6.480128 | H | -2.689017 | -2.908184 | 1.845634 |
| H | -2.577839 | 0.196220  | 5.712335 | C | -0.318583 | -1.547211 | 1.549275 |
| C | -3.969880 | 3.285424  | 6.196042 | C | 0.285170  | -2.400290 | 2.495498 |
| H | -4.332037 | 3.933466  | 6.989843 | C | 0.338959  | -1.311575 | 0.324968 |
| C | -4.578129 | 5.076760  | 4.558201 | C | 1.530657  | -2.995383 | 2.232473 |

|                                 |                                |
|---------------------------------|--------------------------------|
| H -0.217345 -2.608145 3.442048  | H 2.087647 -1.704848 -0.885482 |
| C 1.585987 -1.904386 0.062796   | H 3.155356 -3.205709 0.809117  |
| H -0.122362 -0.657699 -0.414057 | H -2.625012 -1.239142 3.828791 |
| C 2.186926 -2.747124 1.014284   | H -1.013866 -0.444883 3.879726 |
| H 1.984436 -3.650784 2.977536   |                                |

### Energy parameters

HF=-1418.0973128

Zero-point vibrational energy 712271.7 (Joules/Mol)

Zero-point correction= 0.271290 (Hartree/Particle)

Thermal correction to Energy= 0.294063

Thermal correction to Enthalpy= 0.295008

Thermal correction to Gibbs Free Energy= 0.215232

Sum of electronic and zero-point Energies= -1417.826023

Sum of electronic and thermal Energies= -1417.803249

Sum of electronic and thermal Enthalpies= -1417.802305

Sum of electronic and thermal Free Energies= -1417.882081

### Compound [Ru](NCH<sub>3</sub>)(CO) in the triplet state, C<sub>T</sub>

#### Cartesian Coordinates

|                                 |                                 |
|---------------------------------|---------------------------------|
| Ru -0.005362 -0.197768 0.245429 | C -4.314227 -0.538662 -0.043269 |
| N 2.074996 -0.364190 0.369436   | C -4.214817 0.815301 0.167767   |
| N 0.141684 1.860294 0.587468    | H -5.014927 1.548461 0.235606   |
| C -2.263843 2.399737 0.527724   | H -5.212272 -1.135644 -0.182823 |
| C 2.254721 -2.798915 0.020898   | C -2.610771 -2.415962 -0.227817 |
| C -0.908589 2.743064 0.666641   | C -1.317293 -2.960788 -0.232406 |
| H 5.204044 0.733605 0.772245    | C -0.989353 -4.363442 -0.417032 |
| C 4.308451 0.137526 0.614052    | H -1.720463 -5.152800 -0.574179 |
| C 0.980866 3.965959 0.987816    | C 0.378780 -4.469436 -0.347827  |
| C 1.307092 2.566187 0.776685    | H 0.991766 -5.363115 -0.436910  |
| C 2.956348 0.668648 0.591134    | H 3.421132 2.713370 0.939756    |
| H -0.999352 4.967730 1.029479   | H 2.964691 -3.623549 -0.052349  |
| C 4.212584 -1.217524 0.403354   | H -3.432785 -3.115745 -0.382209 |
| C 2.599563 2.015365 0.774778    | H -2.980555 3.217409 0.612380   |
| C -0.387833 4.075366 0.919550   | N 0.035956 -0.350149 2.207423   |
| C 2.801231 -1.525002 0.249934   | C 0.757157 0.215176 3.284008    |
| H 1.712343 4.750838 1.164654    | H 0.434832 -0.217127 4.250376   |
| H 5.013727 -1.951104 0.355160   | H 1.843917 0.032830 3.156006    |
| C 0.898712 -3.132408 -0.120921  | H 0.601293 1.312992 3.315111    |
| N -0.154491 -2.245338 -0.055142 | C 0.195754 0.167880 -1.622078   |
| C -2.801360 1.123837 0.295943   | O 0.392348 0.456474 -2.733772   |
| N -2.073157 -0.039401 0.163755  |                                 |
| C -2.962237 -1.069282 -0.045733 |                                 |

### Energy parameters

HF=-1290.7457827

Zero-point vibrational energy 827951.3 (Joules/Mol)

Zero-point correction= 0.315350 (Hartree/Particle)

|                                              |              |
|----------------------------------------------|--------------|
| Thermal correction to Energy=                | 0.338719     |
| Thermal correction to Enthalpy=              | 0.339663     |
| Thermal correction to Gibbs Free Energy=     | 0.263095     |
| Sum of electronic and zero-point Energies=   | -1290.430433 |
| Sum of electronic and thermal Energies=      | -1290.407064 |
| Sum of electronic and thermal Enthalpies=    | -1290.406120 |
| Sum of electronic and thermal Free Energies= | -1290.482688 |

### Compound 12, imaginary frequency at -267.1 cm<sup>-1</sup>

#### Cartesian Coordinates

|                                 |                                 |
|---------------------------------|---------------------------------|
| Ru -0.156125 -0.057842 0.072790 | C -2.001454 -2.396521 -0.789050 |
| N 1.772140 -0.729439 0.465528   | C -1.997917 -3.831565 -1.018449 |
| N 0.410893 1.859312 0.636196    | H -2.862704 -4.409130 -1.336466 |
| C -1.784061 2.965400 0.389723   | C -0.724868 -4.277171 -0.754989 |
| C 1.423724 -3.123506 -0.032135  | H -0.339138 -5.292081 -0.816324 |
| C -0.413496 2.960958 0.695243   | H 3.749457 1.911834 1.319700    |
| H 5.027169 -0.428966 1.173740   | H 1.927213 -4.090237 -0.075483  |
| C 4.035361 -0.787256 0.908268   | H -4.043964 -2.015874 -1.242016 |
| C 1.659015 3.690212 1.278652    | H -2.298459 3.921939 0.491278   |
| C 1.680624 2.269001 0.978208    | N -0.763156 -0.483847 1.962094  |
| C 2.853736 0.051119 0.809006    | C -1.992498 -1.055592 2.414751  |
| H -0.039933 5.117472 1.242555   | H -2.139978 -2.043790 1.936631  |
| C 3.642033 -2.071012 0.615316   | H -2.839933 -0.417518 2.095949  |
| C 2.808486 1.435235 1.042453    | H -2.018940 -1.176525 3.508844  |
| C 0.364163 4.116863 1.108118    | C 0.756199 -1.098089 4.293779   |
| C 2.218844 -2.025003 0.331061   | C 0.502248 0.074287 3.613030    |
| H 2.526582 4.270957 1.583004    | C 0.262788 0.265949 -1.744241   |
| H 4.247877 -2.973732 0.592591   | O 0.465512 0.441919 -2.882636   |
| C 0.059738 -3.117064 -0.367113  | H 1.237723 0.469374 2.917812    |
| N -0.743591 -2.000497 -0.396335 | H -0.247966 0.772262 3.991541   |
| C -2.565826 1.882241 -0.044577  | C -0.142870 -1.591331 5.397084  |
| N -2.105666 0.600746 -0.239065  | H 0.444627 -1.824802 6.302664   |
| C -3.167207 -0.169108 -0.657650 | H -0.915967 -0.855203 5.660360  |
| C -4.355034 0.664140 -0.739989  | H -0.639776 -2.534134 5.101207  |
| C -3.984228 1.930950 -0.357709  | C 1.864763 -2.021639 3.863668   |
| H -4.602004 2.823310 -0.289800  | H 2.470255 -2.339769 4.730169   |
| H -5.337455 0.311857 -1.045552  | H 1.441400 -2.942020 3.420771   |
| C -3.112885 -1.547356 -0.920762 | H 2.518629 -1.557818 3.115055   |

#### Energy parameters

HF=-1447.8797099

Zero-point vibrational energy 1108562.5 (Joules/Mol)

Zero-point correction= 0.422229 (Hartree/Particle)

Thermal correction to Energy= 0.451538

Thermal correction to Enthalpy= 0.452482

Thermal correction to Gibbs Free Energy= 0.363119

Sum of electronic and zero-point Energies= -1447.457481

Sum of electronic and thermal Energies= -1447.428172

Sum of electronic and thermal Enthalpies= -1447.427228

Sum of electronic and thermal Free Energies= -1447.516591

**Compound 13, [Ru](CH<sub>3</sub>NCH<sub>2</sub>C(CH<sub>3</sub>)<sub>2</sub>)(CO)<sub>T</sub>**

## Cartesian Coordinates

|                                  |                                 |
|----------------------------------|---------------------------------|
| Ru -0.326700 -0.133100 -0.249800 | C -2.155100 -2.373700 -1.370900 |
| N 1.578500 -0.856200 0.172300    | C -2.153000 -3.786600 -1.709000 |
| N 0.240100 1.734600 0.462800     | H -3.002500 -4.324500 -2.123400 |
| C -1.932000 2.881200 0.209600    | C -0.903700 -4.270700 -1.403400 |
| C 1.215800 -3.206900 -0.489100   | H -0.525500 -5.283600 -1.520200 |
| C -0.574800 2.838700 0.568900    | H 3.546000 1.690900 1.293500    |
| H 4.793400 -0.663300 1.071800    | H 1.707400 -4.176800 -0.575900  |
| C 3.811900 -0.984700 0.731400    | H -4.156500 -1.921700 -1.933200 |
| C 1.480900 3.499300 1.280500     | H -2.439500 3.836200 0.351800   |
| C 1.500000 2.102300 0.882600     | N -0.908500 -0.649300 1.676600  |
| C 2.651500 -0.118700 0.621700    | C -2.120500 -1.392200 1.966900  |
| H -0.200900 4.947200 1.279000    | H -2.773800 -1.407100 1.090600  |
| C 3.414700 -2.239600 0.335400    | H -2.652100 -0.954100 2.830700  |
| C 2.613500 1.248600 0.941100     | H -1.860500 -2.433500 2.236800  |
| C 0.197900 3.953100 1.090800     | C 0.192200 -1.474900 3.777600   |
| C 2.010300 -2.148200 -0.021000   | C -0.121100 -0.306100 2.881100  |
| H 2.341700 4.046600 1.657300     | C 0.198700 0.314300 -2.004700   |
| H 4.006600 -3.150600 0.287700    | O 0.520600 0.587500 -3.095400   |
| C -0.131300 -3.155500 -0.882800  | H 0.801400 0.168100 2.529300    |
| N -0.921700 -2.028300 -0.865600  | H -0.710900 0.444400 3.444000   |
| C -2.704100 1.842400 -0.335600   | C -0.677300 -1.805000 4.954700  |
| N -2.253500 0.566900 -0.589600   | H -1.405200 -2.610200 4.719300  |
| C -3.296700 -0.144000 -1.141800  | H -0.073500 -2.177500 5.801400  |
| C -4.462500 0.717800 -1.237400   | H -1.255700 -0.931500 5.293700  |
| C -4.097700 1.943600 -0.735000   | C 1.201300 -2.472900 3.296500   |
| H -4.704100 2.841400 -0.640500   | H 1.600500 -3.074100 4.129700   |
| H -5.427600 0.410600 -1.633300   | H 0.756000 -3.180300 2.566100   |
| C -3.243900 -1.497600 -1.512800  | H 2.035600 -1.983800 2.771000   |

**Energy parameters**

HF=-1447.9058799

Zero-point vibrational energy 1115248.5 (Joules/Mol)

Zero-point correction= 0.424776 (Hartree/Particle)

Thermal correction to Energy= 0.453880

Thermal correction to Enthalpy= 0.454824

Thermal correction to Gibbs Free Energy= 0.366275

Sum of electronic and zero-point Energies= -1447.481104

Sum of electronic and thermal Energies= -1447.452000

Sum of electronic and thermal Enthalpies= -1447.451055

Sum of electronic and thermal Free Energies= -1447.539605

**Compound 14, [Ru](1,2,2-trimethylaziridine)(CO)<sub>s</sub>**

## Cartesian Coordinates

|                                  |                                |
|----------------------------------|--------------------------------|
| Ru -0.241331 -0.297483 -0.164508 | C -1.697281 2.753925 0.513955  |
| N 1.630792 -1.122247 0.162917    | C 1.121179 -3.443134 -0.503125 |
| N 0.429069 1.502490 0.620039     | C -0.324729 2.644860 0.789976  |

|                                 |                                 |
|---------------------------------|---------------------------------|
| H 4.912478 -1.076739 0.809074   | C -1.039054 -4.333838 -1.505912 |
| C 3.892405 -1.354635 0.554414   | H -0.724126 -5.363987 -1.655349 |
| C 1.817764 3.225064 1.279945    | H 3.809602 1.346968 1.042662    |
| C 1.744341 1.831137 0.881270    | H 1.551161 -4.440308 -0.606171  |
| C 2.773568 -0.430976 0.501181   | H -4.134813 -1.768658 -1.975030 |
| H 0.199305 4.732806 1.463394    | H -2.153786 3.725089 0.709475   |
| C 3.401445 -2.598885 0.238765   | N -1.056019 -1.000539 1.958999  |
| C 2.827004 0.939693 0.801567    | C -2.171894 -1.963325 1.783729  |
| C 0.538011 3.724811 1.235575    | H -1.767303 -2.921777 1.437414  |
| C 1.983516 -2.437907 -0.035594  | H -2.849307 -1.562244 1.027377  |
| H 2.733926 3.741058 1.557369    | H -2.742443 -2.115540 2.709945  |
| H 3.941422 -3.540601 0.174009   | C -0.338264 -1.060053 3.283175  |
| C -0.210656 -3.292925 -0.922025 | C -1.311110 0.037590 2.991182   |
| N -0.927248 -2.117714 -0.876559 | C 0.243877 0.225740 -1.837388   |
| C -2.532058 1.776147 -0.050817  | O 0.550237 0.561946 -2.922288   |
| N -2.141501 0.499504 -0.391040  | H -0.935867 1.030688 2.743306   |
| C -3.210772 -0.111382 -1.012590 | H -2.297362 0.005693 3.464511   |
| C -4.336308 0.806453 -1.037529  | C -0.679488 -2.166860 4.280901  |
| C -3.920190 1.969050 -0.434560  | H -0.298778 -3.136680 3.922783  |
| H -4.485207 2.883894 -0.271782  | H -0.176050 -1.938099 5.231869  |
| H -5.311619 0.577657 -1.460694  | H -1.751636 -2.261081 4.488698  |
| C -3.209812 -1.425018 -1.510446 | C 1.145504 -0.750331 3.256666   |
| C -2.166670 -2.362081 -1.425874 | H 1.480948 -0.533036 4.283021   |
| C -2.243059 -3.754946 -1.829394 | H 1.720038 -1.605948 2.873690   |
| H -3.112288 -4.218988 -2.289554 | H 1.349840 0.119402 2.634580    |

### Energy parameters

HF=-1447.964319

Zero-point vibrational energy 1130358.7 (Joules/Mol)

Zero-point correction= 0.430531 (Hartree/Particle)

Thermal correction to Energy= 0.458035

Thermal correction to Enthalpy= 0.458979

Thermal correction to Gibbs Free Energy= 0.376265

Sum of electronic and zero-point Energies= -1447.533788

Sum of electronic and thermal Energies= -1447.506284

Sum of electronic and thermal Enthalpies= -1447.505340

Sum of electronic and thermal Free Energies= -1447.588054

### Compound 15, [Ru](4,5-dihydro-1,5,5-trimethyl-1H-1,2,3-triazole)(CO)<sub>5</sub>

#### Cartesian Coordinates

|                                 |                                 |
|---------------------------------|---------------------------------|
| Ru -0.237293 0.001162 -0.333708 | C 2.415832 -0.268743 1.241949   |
| N 1.347427 -0.912268 0.656746   | H 0.697794 5.208970 0.102232    |
| N 0.560055 1.866289 0.102950    | C 2.777941 -2.492463 1.541456   |
| C -1.213165 3.268067 -0.886491  | C 2.594419 1.122925 1.288341    |
| C 0.650842 -3.265996 0.388586   | C 0.891297 4.146702 0.232116    |
| C 0.013656 3.085069 -0.230729   | C 1.537722 -2.267097 0.820405   |
| H 4.242859 -1.022476 2.329347   | H 2.817237 4.011524 1.326650    |
| C 3.319479 -1.256769 1.804646   | H 3.168441 -3.471669 1.808938   |
| C 1.959197 3.543006 0.850202    | C -0.588546 -3.082548 -0.245229 |
| C 1.742757 2.108464 0.764869    | N -1.134019 -1.861877 -0.580028 |

|   |           |           |           |   |           |           |          |
|---|-----------|-----------|-----------|---|-----------|-----------|----------|
| C | -2.114677 | 2.270854  | -1.288075 | N | -1.243843 | 0.055632  | 1.589839 |
| N | -1.920605 | 0.917152  | -1.131593 | C | -1.109633 | -1.028323 | 2.597277 |
| C | -3.045032 | 0.279366  | -1.605125 | C | -2.309650 | -0.784442 | 3.532819 |
| C | -3.990742 | 1.270885  | -2.089656 | H | -1.118627 | -2.002957 | 2.099451 |
| C | -3.413466 | 2.502347  | -1.896884 | N | -2.017186 | 0.969879  | 2.012924 |
| H | -3.820363 | 3.483357  | -2.131038 | N | -2.510102 | 0.672475  | 3.228023 |
| H | -4.964771 | 1.040190  | -2.515009 | C | -3.696868 | 1.408873  | 3.656916 |
| C | -3.249525 | -1.109340 | -1.606050 | H | -4.611348 | 1.035283  | 3.166779 |
| C | -2.372071 | -2.098827 | -1.135336 | H | -3.796129 | 1.301715  | 4.744619 |
| C | -2.624040 | -3.528953 | -1.151148 | H | -3.556713 | 2.467588  | 3.408210 |
| H | -3.530311 | -3.992895 | -1.533685 | H | -0.139911 | -0.892679 | 3.103059 |
| C | -1.519736 | -4.137667 | -0.604050 | C | -1.997497 | -1.002248 | 5.016154 |
| H | -1.341881 | -5.199087 | -0.447113 | H | -2.862150 | -0.731617 | 5.640441 |
| H | 3.495220  | 1.478784  | 1.790219  | H | -1.771620 | -2.064128 | 5.191877 |
| H | 0.943647  | -4.296679 | 0.593065  | H | -1.131328 | -0.398354 | 5.321523 |
| H | -4.196836 | -1.459036 | -2.018784 | C | -3.541200 | -1.596624 | 3.077123 |
| H | -1.511800 | 4.299259  | -1.079613 | H | -3.330303 | -2.667961 | 3.208357 |
| C | 0.607294  | -0.086469 | -1.966586 | H | -4.429029 | -1.341503 | 3.673166 |
| O | 1.146110  | -0.140916 | -3.009789 | H | -3.752210 | -1.409305 | 2.014045 |

### Energy parameters

HF=-1557.3944623

Zero-point vibrational energy 1153042.2 (Joules/Mol)

Zero-point correction= 0.439171 (Hartree/Particle)

Thermal correction to Energy= 0.468921

Thermal correction to Enthalpy= 0.469865

Thermal correction to Gibbs Free Energy= 0.379989

Sum of electronic and zero-point Energies= -1556.955292

Sum of electronic and thermal Energies= -1556.925541

Sum of electronic and thermal Enthalpies= -1556.924597

Sum of electronic and thermal Free Energies= -1557.014473

### Compound isobutene

Cartesian Coordinates

|   |           |           |           |   |           |          |           |
|---|-----------|-----------|-----------|---|-----------|----------|-----------|
| C | -2.613246 | 0.138610  | 0.112929  | H | -2.406167 | 3.137427 | -1.078559 |
| H | -2.089652 | -0.818782 | 0.170590  | H | -3.731512 | 2.531412 | -0.039803 |
| H | -3.703533 | 0.123168  | 0.184384  | C | -0.429133 | 1.345511 | -0.143109 |
| C | -1.938886 | 1.296416  | -0.041022 | H | -0.120462 | 1.807672 | -1.097005 |
| C | -2.640020 | 2.635554  | -0.123473 | H | -0.006819 | 1.973222 | 0.660895  |
| H | -2.287513 | 3.307500  | 0.678383  | H | 0.018144  | 0.343087 | -0.077373 |

### Energy parameters

HF=-157.1260698

Zero-point vibrational energy 274883.0 (Joules/Mol)

Zero-point correction= 0.104697 (Hartree/Particle)

Thermal correction to Energy= 0.110131

Thermal correction to Enthalpy= 0.111076

Thermal correction to Gibbs Free Energy= 0.077289

Sum of electronic and zero-point Energies= -157.021372



Sum of electronic and thermal Energies= -157.015938  
Sum of electronic and thermal Enthalpies= -157.014994  
Sum of electronic and thermal Free Energies= -157.048781

### Compound methylazide CH<sub>3</sub>N<sub>3</sub>

#### Cartesian Coordinates

|                                |                               |  |
|--------------------------------|-------------------------------|--|
| N -0.002226 -0.606884 2.428170 | H 0.856195 -0.003348 4.298133 |  |
| N -1.078385 -1.069532 2.817261 | H 1.560071 0.711944 2.812096  |  |
| N -2.082670 -1.585694 3.058781 | H -0.024105 1.296019 3.416329 |  |
| C 0.628220 0.414995 3.304530   |                               |  |

#### Energy parameters

HF=-203.9794983  
Zero-point vibrational energy 128579.6 (Joules/Mol)  
Zero-point correction= 0.048973 (Hartree/Particle)  
Thermal correction to Energy= 0.053491  
Thermal correction to Enthalpy= 0.054436  
Thermal correction to Gibbs Free Energy= 0.022352  
Sum of electronic and zero-point Energies= -203.930525  
Sum of electronic and thermal Energies= -203.926007  
Sum of electronic and thermal Enthalpies= -203.925063  
Sum of electronic and thermal Free Energies= -203.957146

### Compound 1,2,2-trimethylaziridine

#### Cartesian Coordinates

|                                |                                |
|--------------------------------|--------------------------------|
| N -1.068929 -0.982158 2.025669 | C -0.674698 -2.157797 4.333436 |
| C -2.154092 -1.930303 1.739481 | H -0.211713 -3.114209 4.038933 |
| H -1.720464 -2.888104 1.413048 | H -0.267131 -1.874199 5.316304 |
| H -2.759891 -1.522047 0.915876 | H -1.755543 -2.311759 4.447636 |
| H -2.827504 -2.122582 2.597130 | C 1.147935 -0.775930 3.201659  |
| C -0.343489 -1.070218 3.314386 | H 1.547338 -0.437352 4.171756  |
| C -1.331546 0.030604 3.065804  | H 1.695042 -1.685633 2.903168  |
| H -0.991917 1.048183 2.844527  | H 1.331188 0.003732 2.448909   |
| H -2.291584 -0.032229 3.595278 |                                |

#### Energy parameters

HF=-251.7088539  
Zero-point vibrational energy 391783.9 (Joules/Mol)  
Zero-point correction= 0.149223 (Hartree/Particle)  
Thermal correction to Energy= 0.156621  
Thermal correction to Enthalpy= 0.157565  
Thermal correction to Gibbs Free Energy= 0.118915  
Sum of electronic and zero-point Energies= -251.559631  
Sum of electronic and thermal Energies= -251.552233  
Sum of electronic and thermal Enthalpies= -251.551289  
Sum of electronic and thermal Free Energies= -251.589939

**Compound (4,5-dihydro-1,5,5-trimethyl-1H-1,2,3-triazole)<sub>TS</sub>**

## Cartesian Coordinates

|                                |                                |
|--------------------------------|--------------------------------|
| N -1.301405 0.549337 1.237725  | H -0.233968 -1.305354 2.384025 |
| C -1.310860 -1.362821 2.222653 | C -1.618824 -0.955845 4.693797 |
| C -2.183067 -1.225238 3.310991 | H -2.332893 -0.401259 5.320623 |
| H -1.646436 -1.894160 1.330388 | H -1.413762 -1.914933 5.202342 |
| N -2.078439 1.149858 1.915627  | H -0.678213 -0.388963 4.639809 |
| N -2.881674 0.849781 2.854618  | C -3.561256 -1.859481 3.269618 |
| C -3.249234 1.870282 3.838326  | H -3.502066 -2.887794 3.668974 |
| H -3.930984 1.384120 4.548366  | H -4.279697 -1.303253 3.889712 |
| H -2.371636 2.253293 4.387895  | H -3.946421 -1.909179 2.241597 |
| H -3.782063 2.712807 3.368714  |                                |

**Energy parameters**

HF=-361.0810712

|                                              |                             |
|----------------------------------------------|-----------------------------|
| Zero-point vibrational energy                | 407887.8 (Joules/Mol)       |
| Zero-point correction=                       | 0.155356 (Hartree/Particle) |
| Thermal correction to Energy=                | 0.165264                    |
| Thermal correction to Enthalpy=              | 0.166208                    |
| Thermal correction to Gibbs Free Energy=     | 0.120764                    |
| Sum of electronic and zero-point Energies=   | -360.925715                 |
| Sum of electronic and thermal Energies=      | -360.915807                 |
| Sum of electronic and thermal Enthalpies=    | -360.914863                 |
| Sum of electronic and thermal Free Energies= | -360.960307                 |

**Compound (4,5-dihydro-1,5,5-trimethyl-1H-1,2,3-triazole)**

## Cartesian Coordinates

|                                |                                |
|--------------------------------|--------------------------------|
| N -1.742508 0.026220 1.179913  | H -0.310654 -0.974711 2.363515 |
| C -1.390372 -1.058866 2.149101 | C -1.496130 -0.952665 4.727477 |
| C -2.247237 -0.763269 3.403015 | H -2.118195 -0.632353 5.577528 |
| H -1.584570 -2.042830 1.701448 | H -1.252378 -2.016281 4.869225 |
| N -2.349213 0.947707 1.799311  | H -0.564112 -0.369584 4.728558 |
| N -2.497198 0.686366 3.133169  | C -3.568363 -1.563227 3.389496 |
| C -3.532580 1.438268 3.836526  | H -3.341991 -2.636275 3.477368 |
| H -4.547506 1.065863 3.612719  | H -4.214080 -1.277278 4.232701 |
| H -3.349762 1.358363 4.916720  | H -4.113639 -1.394636 2.448886 |
| H -3.459812 2.491286 3.537626  |                                |

**Energy parameters**

HF=-361.1375379

|                                              |                             |
|----------------------------------------------|-----------------------------|
| Zero-point vibrational energy                | 420638.8 (Joules/Mol)       |
| Zero-point correction=                       | 0.160213 (Hartree/Particle) |
| Thermal correction to Energy=                | 0.168959                    |
| Thermal correction to Enthalpy=              | 0.169904                    |
| Thermal correction to Gibbs Free Energy=     | 0.127579                    |
| Sum of electronic and zero-point Energies=   | -360.977325                 |
| Sum of electronic and thermal Energies=      | -360.968578                 |
| Sum of electronic and thermal Enthalpies=    | -360.967634                 |
| Sum of electronic and thermal Free Energies= | -361.009959                 |

## Compound $\alpha$ -methylstyrene

### Cartesian Coordinates

|                                |                                 |
|--------------------------------|---------------------------------|
| C 1.031773 -1.777992 -0.308123 | C -1.889205 -1.765815 -0.959148 |
| C 0.078549 -1.566885 0.630792  | C -3.634468 -2.311882 1.164838  |
| H 0.794480 -2.165190 -1.299996 | H -1.912230 -2.098647 2.443563  |
| H 2.082068 -1.578451 -0.088134 | C -3.246797 -2.007128 -1.211655 |
| C 0.465704 -1.092092 2.020675  | H -1.225915 -1.521462 -1.789317 |
| H 0.268855 -1.871703 2.775140  | C -4.128760 -2.285739 -0.150060 |
| H 1.534837 -0.842808 2.063081  | H -4.306824 -2.520585 1.998868  |
| H -0.120614 -0.206673 2.315066 | H -3.620360 -1.964224 -2.236293 |
| C -1.368121 -1.805684 0.358957 | H -5.186449 -2.468675 -0.345831 |
| C -2.273422 -2.069166 1.415877 |                                 |

### Energy parameters

HF=-348.7226592

Zero-point vibrational energy 413526.8 (Joules/Mol)

Zero-point correction= 0.157504 (Hartree/Particle)

Thermal correction to Energy= 0.165679

Thermal correction to Enthalpy= 0.166623

Thermal correction to Gibbs Free Energy= 0.124607

Sum of electronic and zero-point Energies= -348.565155

Sum of electronic and thermal Energies= -348.556980

Sum of electronic and thermal Enthalpies= -348.556036

Sum of electronic and thermal Free Energies= -348.598052

## Compound 3,5-bis(trifluoromethyl)phenyl azide, Ar'N<sub>3</sub>

### Cartesian Coordinates

|                               |                               |
|-------------------------------|-------------------------------|
| N 1.674006 0.897695 -1.315378 | C -1.608330 3.861647 2.669368 |
| N 0.744872 0.939713 -0.639580 | H -1.964029 4.628835 3.352405 |
| N -0.296923 0.825578 0.025237 | C 0.362856 5.328820 2.161307  |
| C -0.681498 1.877723 0.893243 | C -3.593003 2.402471 3.279686 |
| C -1.871069 1.673551 1.614940 | F -4.060610 3.507696 3.924297 |
| C 0.050604 3.074587 1.052709  | F -4.601221 1.948665 2.472852 |
| C -2.324007 2.668957 2.494134 | F -3.393750 1.436667 4.233013 |
| H -2.429853 0.749078 1.480597 | F -0.447338 6.430722 2.156913 |
| C -0.423448 4.052036 1.936164 | F 1.326099 5.534339 1.218415  |
| H 0.969961 3.240861 0.494016  | F 0.993383 5.313060 3.379163  |

### Energy parameters

HF=-1069.3441665

Zero-point vibrational energy 285332.7 (Joules/Mol)

Zero-point correction= 0.108678 (Hartree/Particle)

Thermal correction to Energy= 0.123323

Thermal correction to Enthalpy= 0.124267

Thermal correction to Gibbs Free Energy= 0.064453

Sum of electronic and zero-point Energies= -1069.235489

Sum of electronic and thermal Energies= -1069.220844

Sum of electronic and thermal Enthalpies= -1069.219900

Sum of electronic and thermal Free Energies= -1069.279714

### Compound Ar'N=NAr'

#### Cartesian Coordinates

|                                |                                |
|--------------------------------|--------------------------------|
| N 0.264491 -1.275521 1.440278  | C 2.920950 0.290788 -2.601885  |
| C 1.405460 -0.706872 2.111759  | H 3.618575 0.705269 -3.325870  |
| C 1.142608 0.163788 3.183033   | C 1.900852 1.670664 5.034971   |
| C 2.726845 -1.096521 1.819370  | C 5.193385 -0.966032 2.194031  |
| C 2.215199 0.712024 3.902694   | C 2.843726 2.542402 -1.472387  |
| H 0.112606 0.423073 3.424810   | C 2.957735 -1.889075 -3.876514 |
| C 3.781421 -0.561639 2.570073  | F 1.090461 2.691143 4.615428   |
| H 2.927098 -1.802407 1.016220  | F 3.014400 2.237128 5.576351   |
| C 3.540624 0.357232 3.605048   | F 1.234986 1.037277 6.051337   |
| H 4.366206 0.777363 4.172939   | F 6.132757 -0.488334 3.054846  |
| N 0.192923 -1.384198 0.190375  | F 5.518665 -0.503771 0.943670  |
| C 1.153765 -0.791192 -0.703922 | F 5.332633 -2.326574 2.152705  |
| C 1.551866 0.556739 -0.598289  | F 2.718393 3.054222 -0.213205  |
| C 1.585249 -1.580795 -1.783136 | F 4.139923 2.729655 -1.857769  |
| C 2.433894 1.084243 -1.548420  | F 2.069729 3.318250 -2.295792  |
| H 1.185408 1.175169 0.217227   | F 2.097069 -1.777880 -4.938320 |
| C 2.493993 -1.042244 -2.706681 | F 3.022665 -3.215086 -3.559165 |
| H 1.236786 -2.608563 -1.871061 | F 4.191453 -1.520122 -4.327046 |

#### Energy parameters

HF=-1919.8738328

Zero-point vibrational energy 527231.4 (Joules/Mol)

Zero-point correction= 0.200812 (Hartree/Particle)

Thermal correction to Energy= 0.227051

Thermal correction to Enthalpy= 0.227995

Thermal correction to Gibbs Free Energy= 0.137873

Sum of electronic and zero-point Energies= -1919.673021

Sum of electronic and thermal Energies= -1919.646782

Sum of electronic and thermal Enthalpies= -1919.645838

Sum of electronic and thermal Free Energies= -1919.735960

### Compound N<sub>2</sub>

#### Cartesian Coordinates

N 0.000000 0.000000 0.013717

N 0.000000 0.000000 1.126283

### Energy parameters

HF=-109.4582665

Zero-point vibrational energy 14213.7 (Joules/Mol)

Zero-point correction= 0.005414 (Hartree/Particle)

Thermal correction to Energy= 0.007774

Thermal correction to Enthalpy= 0.008718

Thermal correction to Gibbs Free Energy= -0.013048

Sum of electronic and zero-point Energies= -109.452853

Sum of electronic and thermal Energies= -109.450492

Sum of electronic and thermal Enthalpies= -109.449548

Sum of electronic and thermal Free Energies= -109.471315

### References

[1] S. Fantauzzi, E. Gallo, A. Caselli, F. Ragaini, P. Macchi, N. Casati, S. Cenini, *Organometallics* 2005, 24, 4710-4713.

[2] E. Gallo, A. Caselli, F. Ragaini, S. Fantauzzi, N. Masciocchi, A. Sironi, S. Cenini, *Inorg. Chem.* 2005, 44, 2039-2049.
